# Supplementary material for: Nanoscale coordination polymers induce immunogenic cell death by amplifying radiation therapy mediated oxidative stress
Source: PubMed Central journal article supplement (PMC7794559; doi:10.1038/s41467-020-20243-8), 2021-01-08
Supplement: 41467_2020_20243_MOESM2_ESM.pdf [file 41467_2020_20243_MOESM2_ESM.pdf]

Reviewers' comments:

Reviewer #1 (Remarks to the Author): expertise in radiotherapy and immunotherapy

#### Summary

The manuscript describes the construction and testing of a novel polymer that accentuates radiation-mediated radical production and increases cancer cell death in vitro. Using immunocompetent mice and syngeneic tumor models, the manuscript demonstrates improved tumor control following systemic administration of the polymer when combined with tumor radiation. Distant tumors are also controlled by the combination, associated with increased proportions of T cells in the local and distant tumors, and control of lung metastases in a spontaneously metastatic primary tumor model.

The manuscript is generally well written, though it could benefit from some slight additional editing for use of English. The figures are clear and extensive, though the IHC images are not satisfactory. These need additional higher magnification components to allow the reader to see the results the authors describe.

The therapy appears effective in vitro and in vivo, but there are significant flaws in various of the more correlative in vivo analyses, such as the T cell infiltration and the H2AX activation, and would need more information on the cells that take up the nanoparticles in vivo to understand how this agent may be working in vivo.

The figure legends do not state whether any of the experiments have been repeated, and whether the results match. This information is essential.

#### Major issues

It is essential that the treatment scheme is clarified for publication. The in vivo RT dose is stated as 6Gy, at randomization (treatment d0). However, in various places the manuscript suggests a second dose was given at d6. This is not very clear and is extremely important for other researchers in the field to know this information. If animals received two doses it would be most appropriate to describe in the form of cycles of treatment, or in a more standard form such as RT 6Gy x2 with fractions delivered 6d apart (or RT 6Gy x1 if it is actually one dose).

The methods used to perform IHC in vivo are missing. These need to be inserted.

The analysis of T cell infiltration is deficient.

-The flow cytometry is poor, and the CD3 and CD4 or CD8 staining looks more like autofluorescence than actual specific staining of a T cell subpopulation.

-It is notable that the supplementary data shows that there are zero T cells in the primary or secondary CT26 tumors without treatment. This is not consistent with data from others who have used these models.

-The data is represented as percentage, without identifying percentage of what parent population. Since both CD4 and CD8 T cells are increasing in proportion, this cannot be percent of CD3 T cells, but no other markers are described in the flow panel.

-The treatment appears to result in almost all splenocytes becoming CD44+CD62L- effector phenotype. It is difficult to believe that all splenocytes are tumor-reactive following treatment. This needs to be clarified.

-These data are not suitable for publication at present.

The correlation between the effect of treatment and CD4 and CD8 T cell infiltration is interesting (with caveats as discussed above), but since the drug increases cancer cell death, it would be necessary to demonstrate whether the mechanism is actually dependent on T cells in vivo. CD4 or

CD8 depletion studies would demonstrate whether primary tumor control occurs via T cell responses and identify the component of tumor control that relates to increased cancer cell death.

The analysis of RT-induced cytotoxicity with drug would be best represented as a clonogenic assay. This is the gold standard for assessing radiosensitizers and would pair well with the existing data to understand the effect of treatment on early immunogenic cell death versus overall clonogenic activity across a range of RT doses.

The H2AX IHC data are problematic. Activation of H2AX is very rapid following RT, but the figure examines p-H2AX 21 day following RT. It is not plausible that this relates to the RT-induced DNA damage, and if real must relate to secondary effects. This must be clarified.

The drug has a clear dose-dependent effect in vitro, but it is unclear what tumor dose is achieved in vivo. Since the authors have imaging information, it would be valuable to calculate what proportion of the in vitro active dose is achieved in the tumor following systemic application.

There needs to be some analysis of the cell types taking up the nanoparticle in vivo. Gadolinium is used as a comparator for uptake studies in vivo, and this is mostly taken up by phagocytic cells – in particular macrophages. It is reasonable that the agent is selectively taken up by tumor-infiltrating macrophages rather than cancer cells in the tumor in vivo. This would significantly change the interpretation of the data.

Figure 8 is cut off in the manuscript file. The bottom part cannot currently be reviewed. It appears to show liver metastases from 4T1 tumors, but would need to be provided for review.

Minor issues.

The dosing and timing used in experiments is not well communicated in the main manuscript or the figure legends. This information is present in the methods, so this is a minor issue. It would be much clearer if the figure legends communicated the RT dose given and the timing when samples were harvested for analysis.

The dose and location of 4T1 injection should be provided.

The authors should discuss in greater depth how this agent differs from similar radiosensitizers that have been applied in preclinical models

Reviewer #2 (Remarks to the Author): expertise in nanoparticles

The paper presents some very interesting pre-clinical data and the therapeutic results are really excellent.

Anyway, the biodistribution of the particles, and more precisely of the gadolinium, is not clear.

- Is the gadolinium stable in the particles ?
- Do we observe any trans-metallation after injection ?
- What is the final distribution of the gadolinium ?
- The sizes of the particles are supposed to be large (more than 100 nm), the authors said that such particles were metabolized through the kidney. It is a very large size, and it's really difficult to believe it may happen without a degradation of the particle and then some risks of "free gadolinium" in the circulation (or low chelates stability). This point is really important and should be studied.
- If it is a stability phenomenon, Hemin@Gd-NCPs and Gd-NCPs should present a different stability and degradation process, and then a lot of observed differences may just come from these points.

## Response to Referees

Dear Reviewers:

Thank you for your good comments concerning our manuscript entitled “Nanoscale coordination polymers induce immunogenic cell death by amplifying radiation therapy mediated oxidative stress” (ID: NCOMMS-20-00266). These comments are all valuable and very helpful for revising and improving our paper, as well as the important guiding significance to our researches. We have studied comments carefully and have made correction which we hope meet with approval. Revised portions are marked in yellow in the paper. The point to point responses to the reviewer's comments are listed as following:

### **Reviewer #1 (expertise in radiotherapy and immunotherapy):**

**Comment 1:** The manuscript is generally well written, though it could benefit from some slight additional editing for use of English. The figures are clear and extensive, though the IHC images are not satisfactory. These need additional higher magnification components to allow the reader to see the results the authors describe.

**Response:** We carefully polished the English expression again with the help of professional Editing Services. We have also replaced with higher magnification IHC images of CD4/CD8<sup>+</sup> T cells in the Supplementary Information 21. Thanks for the reviewer's carefulness.

**Comment 2:** The figure legends do not state whether any of the experiments have been repeated, and whether the results match. This information is essential.

**Response:** We are very sorry for our negligence. We have supplemented these statements in the figure legends where the experiments were repeated. The modified figure legends included: Fig 2h, 2i; 3a-3f; 4c; 5d; 6a, 6c-6e; 7i, 7j.

**Comment 3:** It is essential that the treatment scheme is clarified for publication. The *in vivo* RT dose is stated as 6 Gy, at randomization (treatment d0). However, in various places the manuscript suggests a second dose was given at d6. This is not very clear and is extremely important for other researchers in the field to know this information. If animals received two doses it would be most appropriate to describe in the form of cycles of treatment, or in a more standard form such as RT 6Gy ×2 with fractions delivered 6d apart (or RT 6Gy ×1 if it is actually one dose).

35 **Response:** The reviewer's suggestion is really beneficial and professional to clarify  
36 the treatment scheme. According to the reviewer's constructive advice, we have  
37 provided the clear description about RT dose in the whole manuscript.

38

39 **Comment 4:** The methods used to perform IHC in vivo are missing. These need to be  
40 inserted.

41 **Response:** Thanks for the reviewer's carefulness. We carefully re-checked the whole  
42 manuscript, and found that the methods of IHC (Ki67, CD4, CD8) and  
43 immunofluorescence (TUNEL,  $\gamma$ -H2AX, CD4, CD8) were missing. We have inserted  
44 these staining methods in the manuscript and marked it in yellow (Page 29, 31  
45 Methods of Manuscript).

46

#### 47 **Comment 5**

48 **Comment 5-1:** The analysis of T cell infiltration is deficient. The flow cytometry is  
49 poor, and the CD3 and CD4 or CD8 staining looks more like autofluorescence than  
50 actual specific staining of a T cell subpopulation. It is notable that the supplementary  
51 data shows that there are zero T cells in the primary or secondary CT26 tumors  
52 without treatment. This is not consistent with data from others who have used these  
53 models.

54 **Response:** Thanks for your valuable comments. The way of the flow cytometric data  
55 we displayed may lead to misunderstandings by reviewers and readers. The same data  
56 was presented differently in "Smooth" and "Pseudocolor" mode of FlowJo, but the  
57 statistics are consistent. In "Smooth" mode, some discrete cells would be ignored,  
58 making them invisible. Acutally, the ratios of CD8<sup>+</sup> T cells in primary CT26 tumors  
59 without treatment were 0.26, 0.67, 0.54, 0.53, 0.46, respectively. The ratios of CD8<sup>+</sup> T  
60 cells in secondary CT26 tumors without treatment were 0.02, 0.89, 0.18, 0.79, 0.85,  
61 respectively. According to the reviewer's advice, we changed the "Smooth" pattern to  
62 "Pseudocolor" mode in Supplementary Figure 18, 19 and Table 2, 3.

63

64

65

66

67

68

69  
70  
71  
72  
73  
74  
75  
76  
77  
78  
79  
80  
81  
82  
83  
84  
85  
86  
87  
88  
89  
90  
91  
92  
93

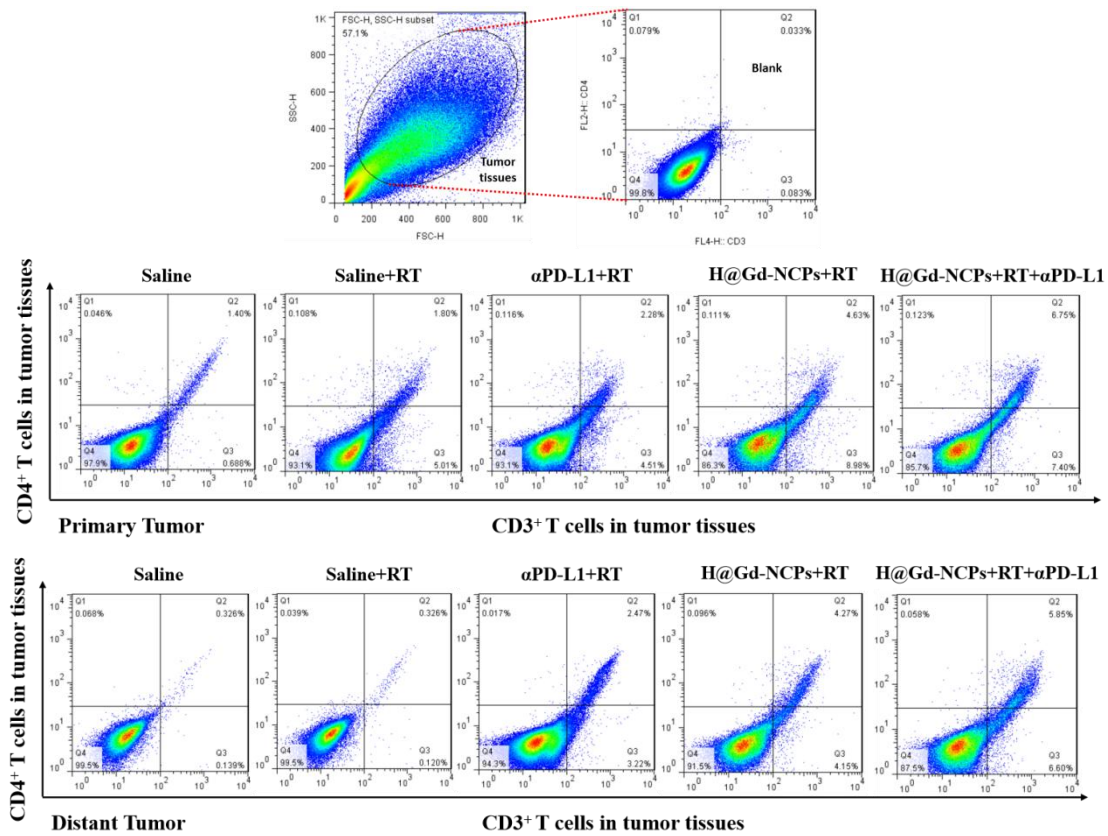

Supplementary Figure 18. CD3<sup>+</sup> CD4<sup>+</sup> T cells detected by Flow cytometry with different treatments in CT26-bearing mice.

Supplementary Table 2. The ratios of CD4<sup>+</sup> T cells in primary and distant tumors detected by Flow cytometry with different treatments in CT26-bearing mice.

| CD4 <sup>+</sup> T cells in Primary tumor (%) | 1    | 2    | 3    | 4    | 5    | Mean ± SEM  |
|-----------------------------------------------|------|------|------|------|------|-------------|
| Saline                                        | 0.47 | 1.40 | 1.57 | 2.01 | 2.24 | 1.54 ± 0.31 |
| Saline+RT                                     | 0.60 | 1.29 | 1.80 | 1.99 | 2.10 | 1.55 ± 0.28 |
| αPD-L1+RT                                     | 2.28 | 2.49 | 2.76 | 2.82 | 2.90 | 2.65 ± 0.12 |
| H@Gd-NCPs+RT                                  | 3.64 | 3.14 | 4.35 | 4.62 | 4.42 | 4.03 ± 0.28 |
| H@Gd-NCPs+RT+αPD-L1                           | 5.85 | 4.63 | 6.75 | 5.79 | 6.71 | 5.95 ± 0.39 |
| CD4 <sup>+</sup> T cells in Distant tumor (%) | 1    | 2    | 3    | 4    | 5    | Mean ± SEM  |
| Saline                                        | 0.07 | 0.33 | 1.19 | 1.9  | 2.32 | 1.16 ± 0.43 |
| Saline+RT                                     | 0.13 | 0.33 | 1.15 | 1.5  | 2.12 | 1.05 ± 0.37 |
| αPD-L1+RT                                     | 2.32 | 2.54 | 2.80 | 2.47 | 3.10 | 2.64 ± 0.14 |
| H@Gd-NCPs+RT                                  | 3.38 | 3.85 | 4.14 | 4.27 | 4.35 | 3.99 ± 0.18 |
| H@Gd-NCPs+RT+αPD-L1                           | 6.72 | 6.7  | 5.85 | 5.75 | 4.89 | 5.98 ± 0.34 |

94  
95

96  
97  
98  
99  
100  
101  
102  
103  
104  
105  
106  
107  
108  
109  
110  
111  
112  
113  
114  
115  
116  
117  
118  
119  
120  
121  
122

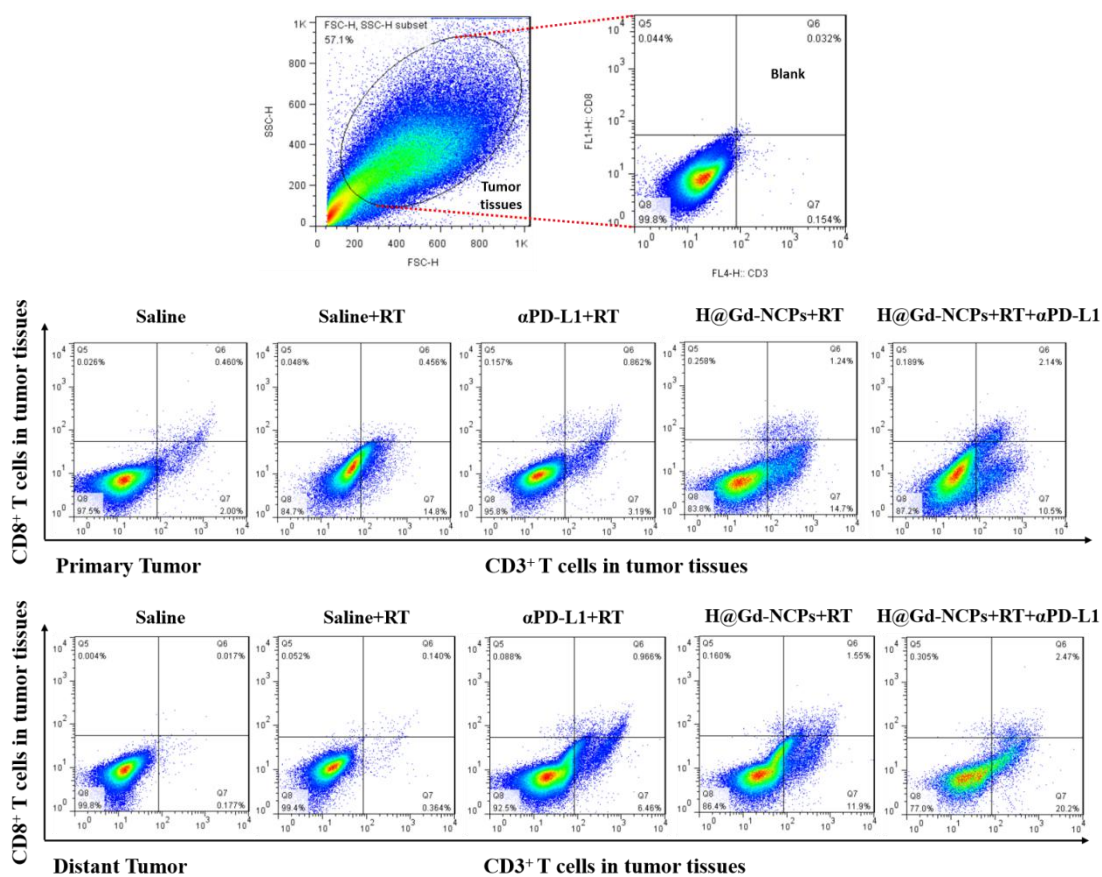

**Supplementary Figure 19.** CD8<sup>+</sup> CD3<sup>+</sup> T cells detected by Flow cytometry (FCM) with different treatments in CT26-bearing mice.

**Supplementary Table 3.** The ratios of CD8<sup>+</sup> T cells in primary and distant tumors detected by Flow cytometry with different treatments in CT26-bearing mice.

| CD8 <sup>+</sup> T cells in Primary tumor (%) | 1    | 2    | 3    | 4    | 5    | Mean ± SEM  |
|-----------------------------------------------|------|------|------|------|------|-------------|
| Saline                                        | 0.26 | 0.67 | 0.54 | 0.53 | 0.46 | 0.49 ± 0.07 |
| Saline+RT                                     | 0.46 | 0.67 | 0.67 | 0.61 | 0.37 | 0.56 ± 0.06 |
| αPD-L1+RT                                     | 0.99 | 0.83 | 0.85 | 0.86 | 0.99 | 0.91 ± 0.03 |
| H@Gd-NCPs+RT                                  | 1.01 | 1.54 | 1.46 | 1.21 | 1.24 | 1.29 ± 0.09 |
| H@Gd-NCPs+RT+αPD-L1                           | 1.91 | 1.91 | 2.05 | 2.14 | 1.70 | 1.94 ± 0.07 |
| CD8 <sup>+</sup> T cells in Distant tumor (%) | 1    | 2    | 3    | 4    | 5    | Mean ± SEM  |
| Saline                                        | 0.02 | 0.89 | 0.18 | 0.79 | 0.85 | 0.55 ± 0.19 |
| Saline+RT                                     | 0.14 | 0.79 | 0.78 | 0.82 | 0.92 | 0.69 ± 0.14 |
| αPD-L1+RT                                     | 1.02 | 0.97 | 1.04 | 1.06 | 1.10 | 1.04 ± 0.02 |
| H@Gd-NCPs+RT                                  | 1.54 | 1.61 | 1.77 | 1.67 | 1.55 | 1.63 ± 0.04 |
| H@Gd-NCPs+RT+αPD-L1                           | 2.29 | 2.23 | 2.31 | 2.23 | 2.47 | 2.31 ± 0.04 |

123

124

125 **Comment 5-2:** The data is represented as percentage, without identifying percentage  
126 of what parent population. Since both CD4 and CD8 T cells are increasing in  
127 proportion, this cannot be percent of CD3 T cells, but no other markers are described  
128 in the flow panel.

129 **Response:** We are very sorry for the negligence. The parent population is all the cells  
130 harvested from tumor tissues (Supplementary Figure 18, 19). To identify CD4<sup>+</sup> or  
131 CD8<sup>+</sup> T cells, we labelled these T cells with anti-CD3 antibody and anti-CD4  
132 antibody or anti-CD8 antibody. Then, the ratio of CD3<sup>+</sup>CD4<sup>+</sup> and CD3<sup>+</sup>CD8<sup>+</sup> T cells  
133 in tumor tissues was added in Supplementary Table 2 and 3.

134

135 **Comment 5-3:** The treatment appears to result in almost all splenocytes becoming  
136 CD44<sup>+</sup> CD62L<sup>-</sup> effector phenotype. It is difficult to believe that all splenocytes are  
137 tumor-reactive following treatment. This needs to be clarified.

138 **Response:** We are very sorry for the negligence to lead to misunderstanding. In this  
139 experiments, the parent population is CD3<sup>+</sup> CD8<sup>+</sup> T cells, and CD44<sup>+</sup> CD62L<sup>-</sup> effector  
140 phenotype percentage refers to the ratio of CD44<sup>+</sup> CD62L<sup>-</sup> effector memory T cells in  
141 CD3<sup>+</sup> CD8<sup>+</sup> T cells. We added the parent population information and statistical data in  
142 Supplementary Figure 23 and Table 4.

143

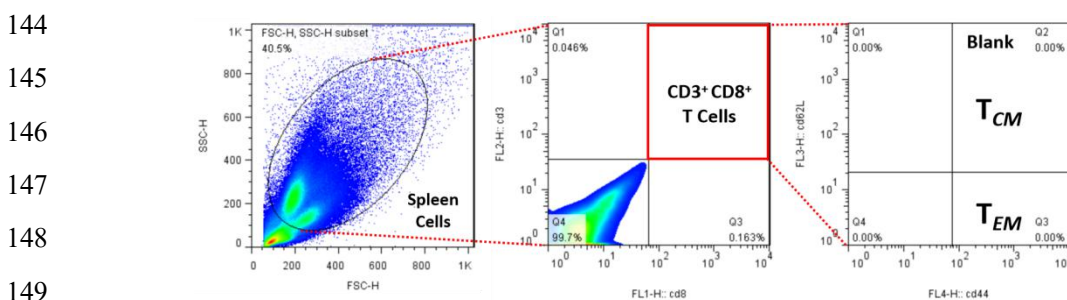

150

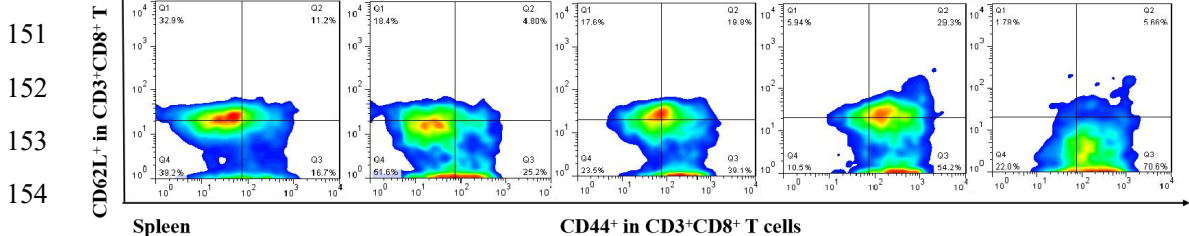

156 **Supplementary Figure 23.** CD44<sup>+</sup> CD62L<sup>-</sup> effector memory T cells in in CD3<sup>+</sup> CD8<sup>+</sup> T cells  
157 detected by Flow cytometry in spleen of treated CT26-bearing mice.

158

159  
160  
161  
162

**Supplementary Table 4.** The ratios of effector memory T cells in spleen detected by Flow cytometry with different treatments in CT26-bearing mice.

| CD44 <sup>+</sup> CD62L <sup>-</sup> effector memory T cells in CD3 <sup>+</sup> CD8 <sup>+</sup> T cells (%) | 1    | 2    | 3    | 4    | 5    | 6    | Mean ± SEM |
|---------------------------------------------------------------------------------------------------------------|------|------|------|------|------|------|------------|
| Saline                                                                                                        | 25.0 | 15.3 | 29.1 | 13.8 | 27.3 | 23.3 | 22.3 ± 2.6 |
| Saline+RT                                                                                                     | 16.7 | 25.2 | 36.7 | 26.3 | 25.0 | 15.4 | 24.2 ± 3.1 |
| αPD-L1+RT                                                                                                     | 39.1 | 35.1 | 39.6 | 35.6 | 34.4 | 41.2 | 37.5 ± 1.1 |
| H@Gd-NCPs+RT                                                                                                  | 54.7 | 54.6 | 50.5 | 54.2 | 56.5 | 50.8 | 53.6 ± 1.0 |
| H@Gd-NCPs+RT+αPD-L1                                                                                           | 70.6 | 75.2 | 57.5 | 66.1 | 61.5 | 56.5 | 64.6 ± 3.0 |

163  
164

165 **Comment 6:** The correlation between the effect of treatment and CD<sup>+</sup>4 and CD8<sup>+</sup> T  
166 cells infiltration is interesting (with caveats as discussed above), but since the drug  
167 increases cancer cell death, it would be necessary to demonstrate whether the  
168 mechanism is actually dependent on T cells *in vivo*. CD4 or CD8 depletion studies  
169 would demonstrate whether primary tumor control occurs *via* T cell responses and  
170 identify the component of tumor control that relates to increased cancer cell death.

171 **Response:** Thanks for the reviewer's constructive comments. According to the  
172 reviewer's valuable suggestion and other previous reports, we speculated that CD8<sup>+</sup> T  
173 cells would play a more important role in tumor inhibition. Then we performed the  
174 CD8<sup>+</sup> T cells depletion experiment on a bilateral model of CT26 tumors.

175 As shown in Fig. 8, we observed that Hemin@Gd-NCPs+RT treatment lost most of  
176 the immunotherapeutic effect in primary CT26 tumors after CD8<sup>+</sup> T cells depletion.  
177 Furthermore, in secondary tumors, CD8<sup>+</sup> T cells depletion completely eliminated the  
178 therapeutic effect of Hemin@Gd-NCPs+RT. We then analyzed infiltrating cytotoxic  
179 CD8<sup>+</sup> T cells in primary and distant tumors, respectively. Hemin@Gd-NCPs  
180 sensitized irradiation remained the effective CD8<sup>+</sup> T cell infiltration (1.26% in  
181 primary tumors and 1.68% in distant tumors), when compared with control or  
182 radiation therapy alone. However, αCD8a treatment also significantly eliminated  
183 Hemin@Gd-NCPs+RT mediated CD8<sup>+</sup> T cell infiltration in primary (0.21%) and  
184 distant (0.30%) tumors, respectively. These results indicated that CD8<sup>+</sup> T cells deeply  
185 involved in Hemin@Gd-NCPs mediated radiation sensitization and  
186 immunotherapeutics (Fig. 8a-8h, Supplementary Table 5). We have discussed the  
187 results in the Page 18 of Manuscript and inserted the detailed methods in the Page 31  
188 of Manuscript, respectively.



189  
 190  
 191  
 192  
 193  
 194  
 195  
 196  
 197  
 198  
 199  
 200  
 201  
 202  
 203  
 204  
 205  
 206  
 207  
 208  
 209  
 210  
 211  
 212  
 213  
 214  
 215  
 216  
 217  
 218  
 219  
 220  
 221  
 222

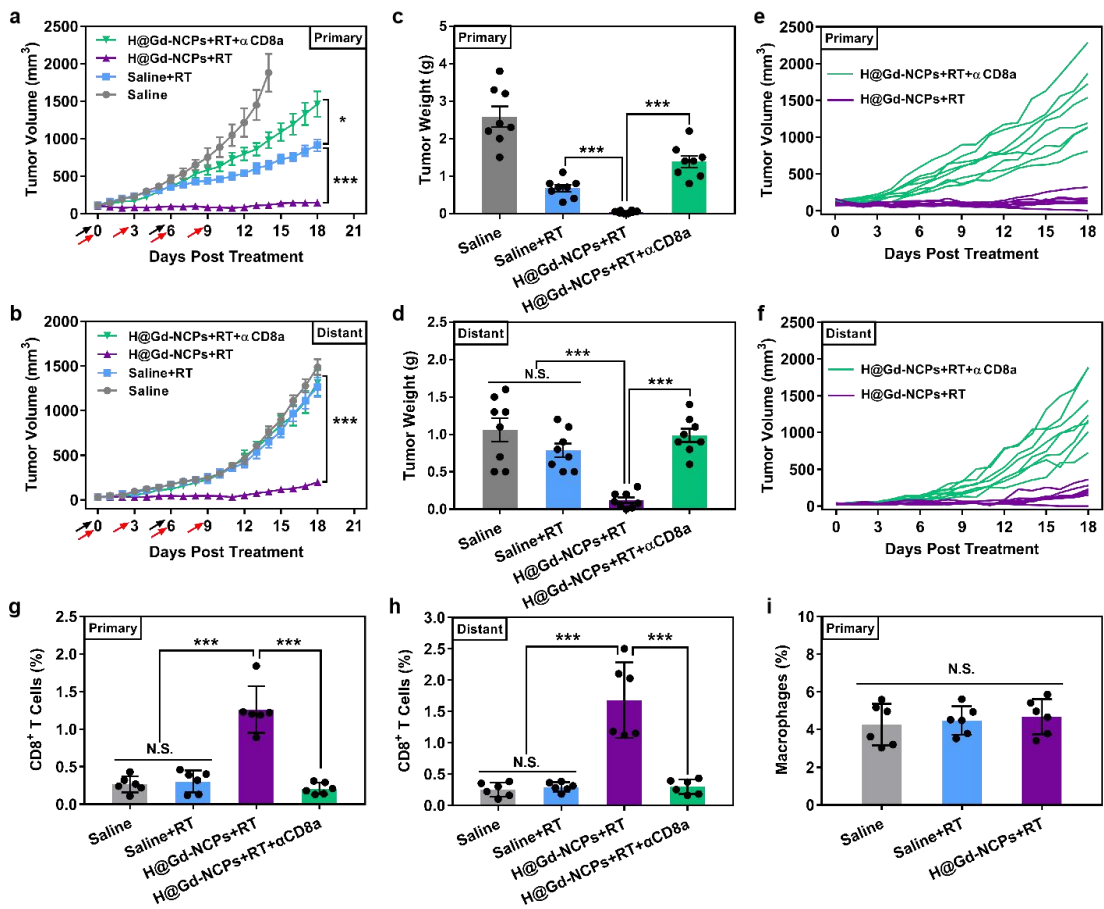

**Fig. 8** CD8<sup>+</sup> T cells depletion experiments and *ex vivo* analysis of immune cells. (a, b) Primary (a) and distant (b) tumor growth curves of CT26 colorectal bilateral tumor-bearing mice treated with Saline, Saline+RT, Hemin@Gd-NCPs+RT and Hemin@Gd-NCPs+RT+ $\alpha$ CD8a (n=8). [Hemin]=12.5 mg/kg, [Gd<sup>3+</sup>]=30 mg/kg and [ $\alpha$ CD8a]=10 mg/kg. Treatments were performed on days 0 and 6. X-ray radiation therapy was performed 6 hours after nanomedicines intravenous injection (black arrow), RT 6Gy  $\times$ 2 with fractions delivered 6 days apart, only primary tumors received radiation therapy. Anti-CD8a antibody was treated *via* intraperitoneal injection 6 hours after radiation therapy (red arrow). Data (a, b) were shown as mean  $\pm$  SEM. (c, d) Primary (c) and distant (d) CT26 tumor weight (n=8). (e, f) Growth curves of primary (e) and distant (f) individual tumors in the Hemin@Gd-NCPs+RT and Hemin@Gd-NCPs+RT+ $\alpha$ CD8a groups. (g, h) The percentages of CD8<sup>+</sup> T cells in the primary (g) and distant (h) tumors analyzed by flow cytometry (n=6). (i) The percentages of macrophages (F4/80<sup>+</sup> and CD11b<sup>+</sup>) in the primary tumors analyzed by flow cytometry (n=6). Data (c, d, g-i) were shown as mean  $\pm$  SD. Two-sided Student's *t*-test was used to calculate statistical difference between two groups. N.S. represented nonsignificance, and \**p* < 0.05, \*\*\**p* < 0.001. Source data are provided as a Source data file.

223 **Comment 7:** The analysis of RT-induced cytotoxicity with drug would be best  
224 represented as a clonogenic assay. This is the gold standard for assessing  
225 radiosensitizers and would pair well with the existing data to understand the effect of  
226 treatment on early immunogenic cell death versus overall clonogenic activity across a  
227 range of RT doses.

228 **Response:** According to the reviewer's constructive advice, we performed the cell  
229 cloning assay to detect RT-induced long-term cytotoxicity. As shown in  
230 Supplementary Figure 6, there were only a few viable cell colonies (12 clones) in the  
231 H@Gd-NCPs+RT group. While in Saline, Saline+RT and Gd-NCPs+RT groups, the  
232 tumor cell colonies were 575, 209 and 123, respectively. These results indicated that  
233 H@Gd-NCPs could effectively sensitize radiation to prevent tumor cell proliferation.  
234 We have discussed the results in the Page 8 of Manuscript and inserted the detailed  
235 methods in the Page 27 of Manuscript, respectively.

236

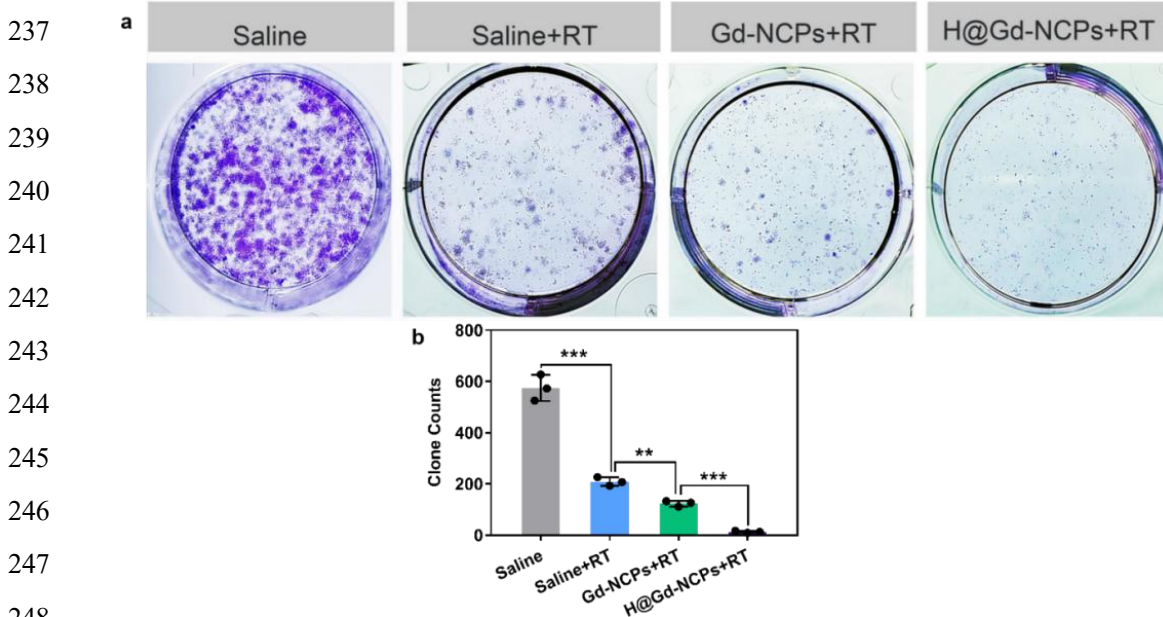

249 **Supplementary Figure 6.** (a) Images and (b) quantification of CT26 cell clones (n=3), this  
250 experiment was repeated twice independently with similar results and all data were shown as  
251 mean ± SD. \*\*p < 0.01; \*\*\*p < 0.001.

252

253 **Comment 8:** The  $\gamma$ -H2AX IHC data are problematic. Activation of  $\gamma$ -H2AX is very  
254 rapid following RT, but the figure examines  $\gamma$ -H2AX 21 day following RT. It is not  
255 plausible that this relates to the RT-induced DNA damage, and if real must relate to  
256 secondary effects. This must be clarified.

257 **Response:** It was really true as the reviewer mentioned that activation of  $\gamma$ -H2AX  
258 was very rapid following radiation. We are very sorry for our negligence of missing  
259 the  $\gamma$ -H2AX staining methods in the manuscript, leading to the misunderstanding.  
260 Actually, the tumor tissues used for  $\gamma$ -H2AX staining were harvested at 24 hours after  
261 radiation treatment. We have inserted the detailed immunofluorescence staining  
262 methods of  $\gamma$ -H2AX into the manuscript (Page 29-30 Methods of Manuscript).

263

264 **Comment 9:** The drug has a clear dose-dependent effect *in vitro*, but it is unclear  
265 what tumor dose is achieved *in vivo*. Since the authors have imaging information, it  
266 would be valuable to calculate what proportion of the *in vitro* active dose is achieved  
267 in the tumor following systemic application.

268 **Response:** Thanks for your valuable advice. MRI information could qualitatively  
269 determine whether there was nanomedicine in tumor tissues, but could not quantify  
270 the drug concentration accumulated within tumor tissues.

271

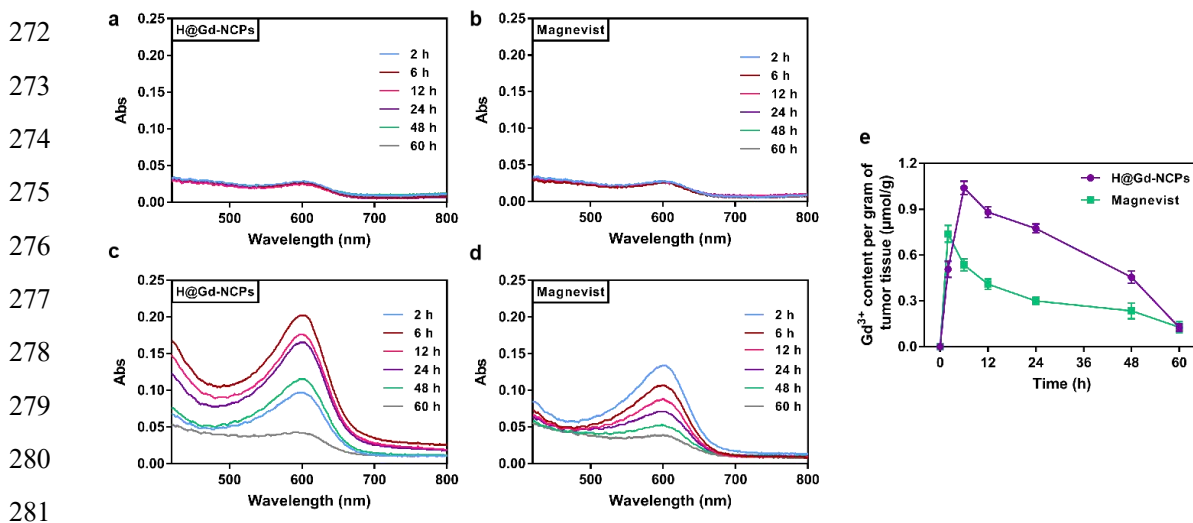

282 **Supplementary Figure 7.** Pharmacokinetic study of dynamic Hemin@Gd-NCPs and Magnevist.  
283 (a, b) UV spectrum of Gd<sup>3+</sup> detection in Hemin@Gd-NCPs (a) and Magnevist (b) without burning  
284 and nitrification. (c, d) UV spectrum of Gd<sup>3+</sup> detection in Hemin@Gd-NCPs (a) and Magnevist (b)  
285 after burning and nitrification. (e) The dynamic concentrations of Hemin@Gd-NCPs or Magnevist  
286 accumulated in the tumor tissues. Data were shown as mean  $\pm$  SD (n=3).

287

288 Herein, we performed the drug accumulation study of Hemin@Gd-NCPs and  
289 Magnevist in tumor tissues by a colorimetric method. After intravenous injection of  
290 Hemin@Gd-NCPs or Magnevist, tumor tissues were respectively collected at 2, 6, 12,

291 24, 48 and 60 hours post administration. The concentrations of Hemin@Gd-NCPs and  
292 Magnevist within tumor tissues were analyzed by a colorimetric method. Specifically,  
293 Thymolphthalein Complexone (TC) was used as a colorimetric reagent to detect  
294 gadolinium in a free state, but not in coordination state. We first tested the tumor  
295 tissues extracts without burning and nitrification, and almost no free  $Gd^{3+}$  could be  
296 detected in Hemin@Gd-NCPs and Magnevist groups (Supplementary Figure 7a, 7b).  
297 While after burning and nitrification, gadolinium accumulated within tumor tissues in  
298 both groups could be detected, respectively. The concentration of Hemin@Gd-NCPs  
299 in the tumor tissues peaked at 6 hours ( $1.04 \mu\text{mol/g}$  tumor tissue) post-injection and  
300 maintained up to 24 hours ( $0.77 \mu\text{mol/g}$  tumor tissue). While Magnevist's  
301 concentration peaked at 2 hours ( $0.74 \mu\text{mol/g}$  tumor tissue) post-injection in the tumor  
302 regions and exhibited rapidly metabolism (Supplementary Figure 7c-7e). These  
303 results indicated that the Hemin@Gd-NCPs and Magnevist were accumulated in the  
304 tumor tissues in the coordination state rather than in a free state. We have discussed  
305 the results in the Page 10 of Manuscript and inserted the detailed methods in the Page  
306 28 of Manuscript, respectively.

307

308 **Comment 10:** There needs to be some analysis of the cell types taking up the  
309 nanoparticle *in vivo*. Gadolinium is used as a comparator for uptake studies *in vivo*,  
310 and this is mostly taken up by phagocytic cells-in particular macrophages. It is  
311 reasonable that the agent is selectively taken up by tumor-infiltrating macrophages  
312 rather than cancer cells in the tumor *in vivo*. This would significantly change the  
313 interpretation of the data.

314 **Response:** We strongly agreed with the reviewer's opinion. If these  
315 Hemin@Gd-NCPs were specifically engulfed by macrophages within the tumor  
316 tissues and then irradiated by RT, the macrophages should be obviously damaged or  
317 killed, which could directly affect the tumor immunological microenvironment.  
318 Therefore, we directly detected the ratios of tumor-associated macrophages (TAMs)  
319 within the tumor tissues after various treatments to explore this possibility. After the  
320 treatment of RT and Hemin@Gd-NCPs+RT, their ratios of TAMs in whole tumor  
321 tissues did not exhibit notable change, when compared with control group. These  
322 results indicated that TAMs might not play a major part in Hemin@Gd-NCPs+RT  
323 mediated anti-tumor effects. On the other hand, these results reminded us that the  
324 tumor microenvironment can be modulated by targeting TAMs to further amplify the  
325 therapeutic advantages of Hemin@Gd-NCPs in the future. These results and

discussion were added in Fig. 8i of Manuscript and Supplementary Figure 25, Table 6.

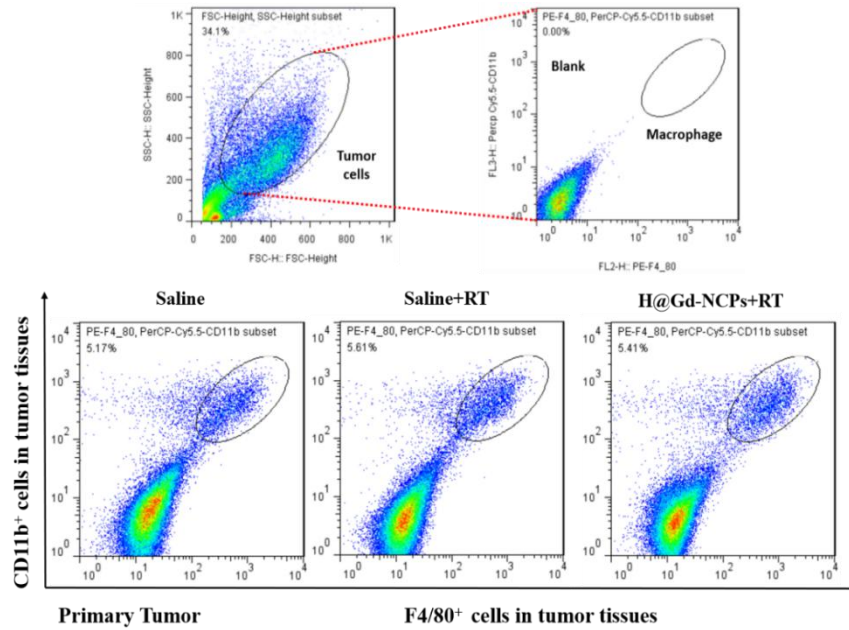

**Supplementary Figure 25.** F4/80<sup>+</sup> and CD11b<sup>+</sup> macrophages detected by Flow cytometry (FCM) with different treatments in CT26-bearing mice.

**Supplementary Table 6.** The ratios of F4/80<sup>+</sup> and CD11b<sup>+</sup> macrophages in primary and distant tumors detected by Flow cytometry with different treatments in CT26-bearing mice.

| Macrophages in Primary tumors (%) | 1    | 2    | 3    | 4    | 5    | 6    | Mean ± SEM  |
|-----------------------------------|------|------|------|------|------|------|-------------|
| Saline                            | 5.17 | 5.59 | 4.96 | 3.62 | 3.20 | 3.04 | 4.26 ± 0.45 |
| Saline+RT                         | 5.61 | 4.94 | 4.52 | 4.48 | 3.79 | 3.52 | 4.48 ± 0.31 |
| H@Gd-NCPs+RT                      | 5.41 | 5.86 | 4.97 | 4.65 | 3.78 | 3.4  | 4.68 ± 0.39 |

**Comment 10:** Figure 8 is cut off in the manuscript file. The bottom part cannot currently be reviewed. It appears to show liver metastases from 4T1 tumors, but would need to be provided for review.

**Response:** Thanks for the reviewer's carefulness. We have reproduced typography according to the *Nature communications'* typesetting requirements. We thus provided modified Fig. 9 (Previous Fig.8) in manuscript.

**Special thanks to Reviewer #1 for his/her good comments. These comments have significantly improved the quality of this paper.**

358 **Reviewer #2 (expertise in nanoparticles):**

359 **Comment 1:** The dosing and timing used in experiments is not well communicated in  
360 the main manuscript or the figure legends. This information is present in the methods,  
361 so this is a minor issue. It would be much clearer if the figure legends communicated  
362 the RT dose given and the timing when samples were harvested for analysis.

363 **Response:** Thanks for your valuable advice. We have inserted the detailed treatment  
364 information in the figure legends (including dosing, timing and administration of  
365 nanomedicines, RT and antibodies, respectively). The modified figure legends  
366 included: Fig. 3, 5, 7, 8 and 9.

367

368 **Comment 2:** The dose and location of 4T1 injection should be provided.

369 **Response:** We are very sorry for our negligence of missing the dose and location of  
370 4T1 injection. We have provided the information "*To evaluate the function of*  
371 *Hemin@Gd-NCPs in inhibiting tumor metastasis, mice bearing 4T1 were established.*  
372 *4T1 cells ( $5 \times 10^5$  cells each mouse) were injected subcutaneously in the right lower*  
373 *flank of mouse.*" In the Page 32 Methods of Manuscript and marked it in yellow.  
374 Please check it and thank you for your carefulness.

375

376 **Comment 3:** The authors should discuss in greater depth how this agent differs from  
377 similar radiosensitizers that have been applied in preclinical models.

378 **Response:** We greatly agreed with the reviewer's valuable suggestion. We added the  
379 discussion about the difference between Hemin@Gd-NCPs and other similar  
380 radiosensitizers in Discussion section of the manuscript (Page 22-24).

381 Briefly, previous studied radiosensitizers (NBTXR3, AGuIX and RiMO-301) are  
382 primarily used to sensitize radiation by depositing X-rays and their clinical benefits  
383 are restricted to a certain extent. Besides, intratumoral administration of some  
384 nanomedicines also severely limited their applications in different types of tumours.  
385 Additionally, biological safety and biocompatibility were also worthy of our serious  
386 consideration. Our established Hemin@Gd-NCPs not only took into account of the  
387 X-ray deposition, but also had the function of GSH depletion and Magnetic  
388 Resonance Imaging. Moreover, the synergetic therapeutic effects of  
389 Hemin@Gd-NCPs could induce powerful ICD and potentiate checkpoint blockade  
390 immunotherapies for systemic anti-tumor immunity.

391

392

393 **Comment 4**

394 **Comment 4-1:** Anyway, the biodistribution of the particles, and more precisely of the  
395 gadolinium, is not clear. Is the gadolinium stable in the particles? Do we observe any  
396 trans-metallation after injection ?

397 Response: We fully understood reviewer's concerns. Then, we performed the dialysis  
398 experiments of Gd-NCPs and Hemin@Gd-NCPs to evaluate their stability. Gd-NCPs  
399 ( $[Gd^{3+}] = 20 \text{ mM}$ ,  $500 \mu\text{L}$ ) and Hemin@Gd-NCPs ( $[Hemin] = 2 \text{ mM}$ ,  $[Gd^{3+}] = 20 \text{ mM}$ ,  
400  $500 \mu\text{L}$ ) were packed into dialysis bags (Solarbio, 10 kD), followed by dialysis in  
401 50% bovine serum solution (5.0 mL) or deionized water (5.0 mL) for 7 days,  
402 respectively. The dialysates were concentrated via vacuum distillation to 1.0 mL to  
403 detect free  $Gd^{3+}$  by colorimetry. As shown in Supplementary Table 1, almost no free  
404  $Gd^{3+}$  could be detected in the dialysates after 7 days' dialysis. These results suggested  
405 that the Gd-NCPs and Hemin@Gd-NCPs could maintain stable in deionized water or  
406 serum. The detailed experiment method was also inserted in the "Page 25 Methods of  
407 Manuscript".

408

409 **Supplementary Table 1.** The calculated concentration of free  $Gd^{3+}$  via UV colorimetry.

410

| <b>Y=0.001644X+0.02784 (SI Figure 2)</b><br>$[Gd^{3+}] = (Abs_{605nm} - 0.02784) / 0.001644$ | <b>Free <math>[Gd^{3+}]</math></b> |      |      |
|----------------------------------------------------------------------------------------------|------------------------------------|------|------|
|                                                                                              | 1                                  | 2    | 3    |
| Gd-NCPs in deionized water                                                                   | N.D.                               | N.D. | N.D. |
| H@Gd-NCPs in deionized water                                                                 | N.D.                               | N.D. | N.D. |
| Gd-NCPs in serum                                                                             | N.D.                               | N.D. | N.D. |
| H@Gd-NCPs in serum                                                                           | N.D.                               | N.D. | N.D. |

\*N.D.: Undetectable, below  $[Gd^{3+}]$  detection limit ( $6.0 \times 10^{-3} \mu\text{M}$ ).

411

412

413 To further evaluate whether the Hemin@Gd-NCPs would undergo trans-metallation  
414 after injection, Hemin@Gd-NCPs ( $[Hemin] = 2 \text{ mM}$ ,  $[Gd^{3+}] = 20 \text{ mM}$ ,  $1.0 \text{ mL}$ ) was  
415 packed into dialysis bags (Solarbio, 10 kD), stirred in the 100.0 mL dialysate (50%  
416 bovine serum, adding extra  $[Na^+] = 150 \text{ mM}$ ,  $[K^+] = 5.0 \text{ mM}$ ,  $[Ca^{2+}] = 2.5 \text{ mM}$ ,  
417  $[Mg^{2+}] = 1.25 \text{ mM}$ ,  $[Zn^{2+}] = 30 \mu\text{M}$ ,  $[Fe^{3+}] = 30 \mu\text{M}$ ,  $[Cu^{2+}] = 30 \mu\text{M}$ ) for 7 days. The  
418 dialysates were concentrated by vacuum distillation, and the concentrated residues  
419 were analyzed by ICP-OES (Avio 500, USA). As shown in Supplementary Figure 4,  
420 all the above metal ions, except Gd, could be detected by ICP-OES, which showed

421 that the gadolinium did not undergo obvious trans-metallation. The detailed  
 422 experiment method and results were inserted in the “Page 26 Methods and Page 6 of  
 423 Manuscript”.

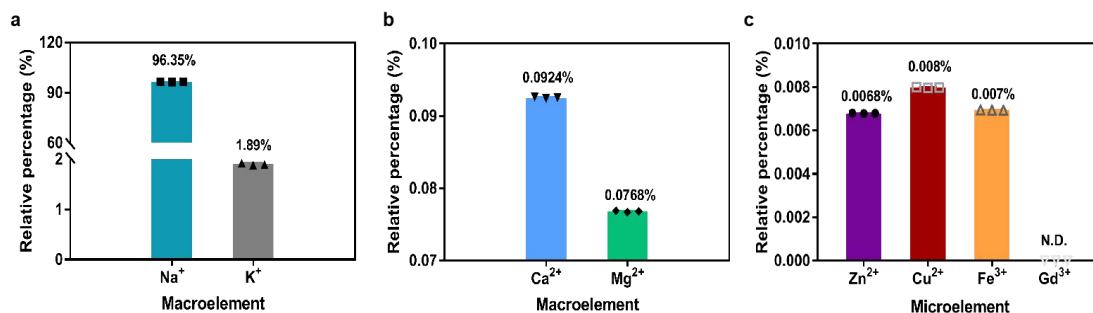

432 **Supplementary Figure 4.** Trans-metallation experiments of Hemin@Gd-NCPs. (a-c) Analysis of  
 433 metal ions content via ICP-OES.

434  
 435 **Comment 4-2:** What is the final distribution of the gadolinium? The sizes of the  
 436 particles are supposed to be large (more than 100 nm), the authors said that such  
 437 particles were metabolized through the kidney. It is a very large size, and it's really  
 438 difficult to believe it may happen without a degradation of the particle and then some  
 439 risks of "free gadolinium" in the circulation (or low chelates stability). This point is  
 440 really important and should be studied. If it is a stability phenomenon,  
 441 Hemin@Gd-NCPs and Gd-NCPs should present a different stability and degradation  
 442 process, and then a lot of observed differences may just come from these points.

443 **Response:** This allowed us to re-examine the metabolic process of the nano-drugs we  
 444 have established. The MRI signal of Hemin@Gd-NCPs reached maximum at 6 hours  
 445 post-injection in the tumor regions and maintained up to 24 hours (Fig. 4e, 4f of  
 446 Manuscript). To further verify the distribution of Hemin@Gd-NCPs in the tumors, we  
 447 also detected their accumulation via a colorimetric method.

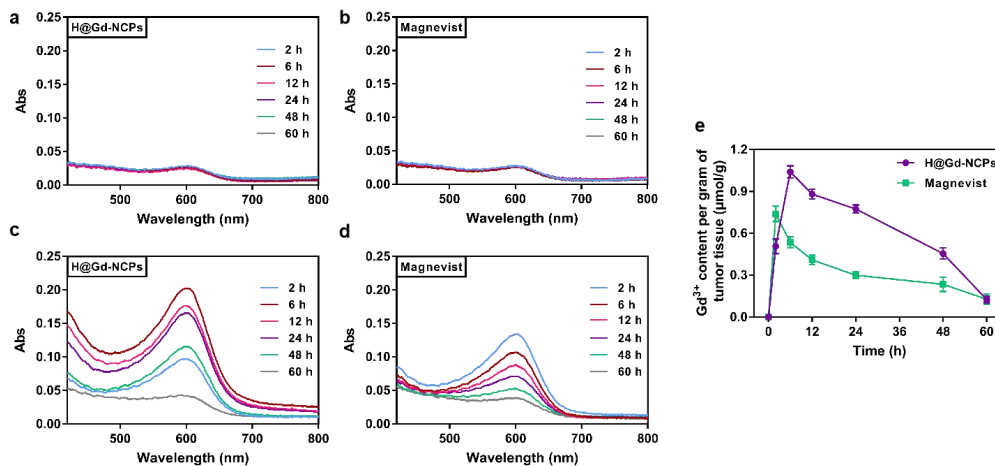



457

458 **Supplementary Figure 7.** Pharmacokinetic study of dynamic Hemin@Gd-NCPs and Magnevist.

459 (a, b) UV spectrum of Gd<sup>3+</sup> detection in Hemin@Gd-NCPs (a) and Magnevist (b) without burning

460 and nitrification. (c, d) UV spectrum of Gd<sup>3+</sup> detection in Hemin@Gd-NCPs (a) and Magnevist (b)

461 after burning and nitrification. (e) The dynamic concentrations of Hemin@Gd-NCPs or Magnevist

462 accumulated in the tumor tissues. Data were shown as mean  $\pm$  SD (n=3).

463

464 As shown in Supplementary Figure 7, after intravenous injection of

465 Hemin@Gd-NCPs, tumor tissues were respectively collected from the CT26

466 tumor-bearing mice at 2, 6, 12, 24, 48 and 60 hours after mice sacrificed. The

467 concentrations of Hemin@Gd-NCPs within tumor tissues were analyzed by a

468 colorimetric method. The colorimetry method can only detect free Gd<sup>3+</sup>, but not in

469 coordination state. We first tested the tumor tissues without burning and nitrification,

470 and almost no free Gd<sup>3+</sup> could be detected in Hemin@Gd-NCPs and Magnevist

471 groups (Supplementary Figure 7a, 7b). While after burning and nitrification,

472 gadolinium accumulated within tumor tissues in both groups could be detected,

473 respectively. The concentration of Hemin@Gd-NCPs in the tumor tissues peaked at 6

474 hours (1.04  $\mu$ mol/g tumor tissue) post-injection and maintained up to 24 hours (0.77

475  $\mu$ mol/g tumor tissue). While Magnevist's concentration peaked at 2 hours (0.74

476  $\mu$ mol/g tumor tissue) post-injection in the tumor regions and exhibited rapidly

477 metabolism (Supplementary Figure 7c-7e). These results indicated that the

478 Hemin@Gd-NCPs and Magnevist were accumulated in the tumor tissues in the

479 coordination state rather than in a free state. We have discussed the results in the Page

480 10 of Manuscript and inserted the detailed methods in the Page 28 of Manuscript,

481 respectively.

482

483

484

485

486

487

488

489

490

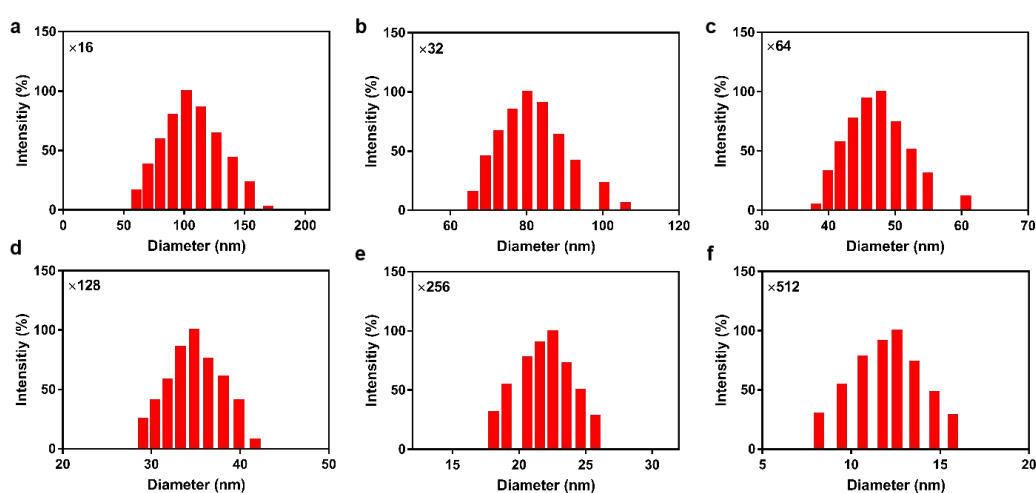

491  
492  
493  
494  
495  
496

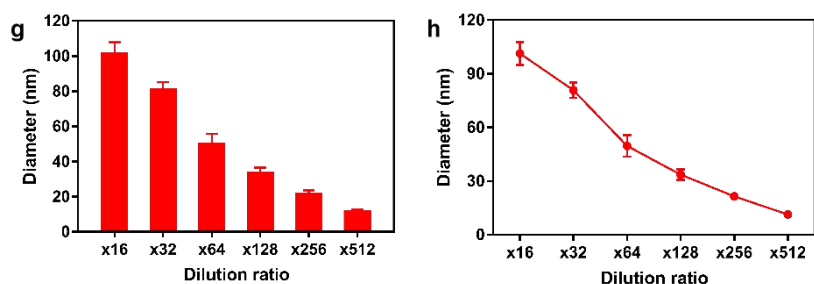

497 **Supplementary Figure 8.** (a-f) DLS data of Hemin@Gd-NCPs diluted 16, 32, 64, 128, 256 and  
498 512 times by serum at 37 °C, respectively (n=3 biologically independent samples). (g) Histogram  
499 of Hemin@Gd-NCPs particle size changes. (h) Line chart of Hemin@Gd-NCPs particle size  
500 change.

501

502 Then, we tried to reveal the metabolism process of these nanomedicines via a  
503 simulation method. Specifically, we used bovine serum albumin solution (50 mg/mL,  
504 37 °C) as the simulated plasma to continuously dilute Hemin@Gd-NCPs. With the  
505 process of dilution, we found that the particle size of Hemin@Gd-NCPs is gradually  
506 decreasing from about 100 nm to 5~10 nm (512 times dilution, Supplementary Figure  
507 8a-8h). These smaller nanoparticles could potentially be metabolized through the  
508 kidneys.

509 Based on this hypothesis, we further detected the state of the metabolic products in  
510 the urine of treated mice. We collected urine from mice at 24-48 hours after  
511 intravenous injection of Hemin@Gd-NCPs. Similarly, we should be able to directly  
512 detect free Gd<sup>3+</sup> via the colorimetric method if there was free Gd<sup>3+</sup> in the urine.  
513 However, the results of direct testing indicated that there was almost no free Gd<sup>3+</sup> in  
514 urine (Supplementary Figure 9a).

515

516

517

518

519

520

521

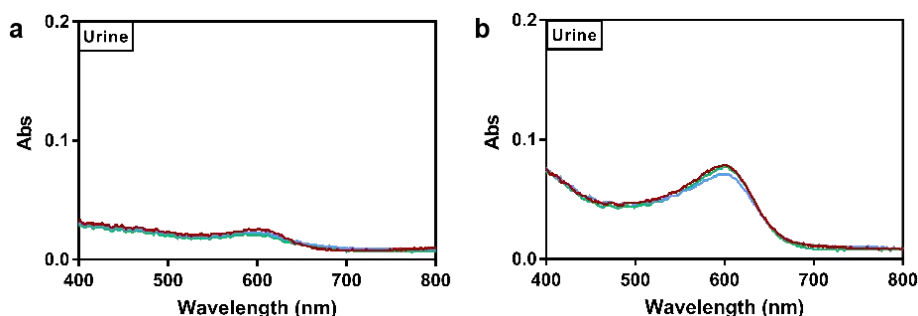

522 **Supplementary Figure 9.** (a, b) UV spectrum of free [Gd<sup>3+</sup>] detection in urine without (a) or with  
523 (b) burning and nitrification.

524

525 We then burned and nitrified the urine sample, which showed that there was  
526 detectable gadolinium (Supplementary Figure 9b). Therefore, it was reasonable to  
527 assume that Hemin@Gd-NCPs became smaller (5~10 nm) through continuous  
528 dilution process after intravenous injection. Then, these smaller nanoparticles could  
529 be gradually metabolized through the kidneys in the coordination state rather than in a  
530 free state.

531 All these results indicated that Hemin@Gd-NCPs could maintain the coordination  
532 state during blood circulation and even after renal excretion. We discussed this part in  
533 the Page 10-11 of Manuscript and the detailed experiment protocols were also  
534 inserted into the “Page 28-29 Methods of Manuscript”, please check it.

535

536 **Special thanks to Reviewer #2 for his/her good comments. These comments have**  
537 **significantly improved the quality of this paper.**

538

539 We tried our best to improve the manuscript and made some changes in the  
540 manuscript. These changes will not influence the content and framework of the paper.  
541 And here we did not list the changes but marked in yellow in revised paper.

542 We appreciate for Reviewers' warm work earnestly, and hope that the correction  
543 will meet with approval.

544 Once again, thank you very much for your comments and suggestions. These  
545 comments have significantly improved the quality of this paper.

546

547 Best Regards

548 Yiqiao Hu PhD, Professor

549 School of Life Science and Medical School of Nanjing University, Nanjing University,  
550 Nanjing 210093, China.

551 Tel: +86-25-83596143; E-mail: huyiqiao@nju.edu.cn.

552

## REVIEWER COMMENTS

Reviewer #1 (Remarks to the Author):

### Summary

The authors have been very responsive to review, clarifying the most important issues such as the treatment scheme, experimental repeats, and missing timing and methods. The manuscript remains strong and has value.

### Major issues

There remain significant issues with the flow cytometry of the tumor and spleen. While there has been some clarification, the authors should know that the quality of the flow cytometry does not reach the standard needed in 2020 for publication in a major journal. The tumor flow cytometry for T cells does not adequately show distinct populations, a well-compensated background, nor sufficient markers to exclude irrelevant cells. This also applies to the spleen, which clearly shows that the voltages have not been correctly applied to identify the true CD44+CD62L- cells that are crushed on the axis. The gates in this figure are set amidst the CD44-CD62L+ naïve cells that normally make up the majority of the mouse spleen.

However, with the presence of supportive (though unquantified) tumor IHC, and the addition of the mechanistic CD8 depleting experiment, this reviewer would propose that all flow cytometry of tumors simply be deleted from the manuscript. These figures are not essential, and while the figures are in place this reviewer would say that these data should not be used to draw conclusions in any case. Therefore, to give concrete suggestions, this reviewer would propose deleting:

Supplementary Figure 15

Supplementary Figure 18

Supplementary Table 2

Supplementary Figure 19

Supplementary Table 3

Supplementary Figure 23

Supplementary Table 4

Supplementary Table 5

Supplementary Figure 25 is a different case. There are clear and discrete populations, and can more reasonably be used.

### Minor issues:

Figure 6e, and description of this on p15 line 485. The western blot does not show that HMGB1 was released. Total lysates of tumors will show HMGB1 levels, but cannot distinguish whether it is inside or outside cells. Minor change to clarify that.

p15 line 510. There are no survival curves in the CT26 tumor work, and while some tumors have completely regressed at the d21 post-treatment harvest, without follow-up it is not possible to assign the animals as 'cured'. Minor change to 'tumor free at d21' or similar.

Reviewer #3 (Remarks to the Author): (to replace Reviewer #2)

1. The authors provided additional data showing the stability of the Hemin-Gd-NCP and no transmetalation occurring both in vitro and in vivo. However, based on the methodology described, mixture of GdCl<sub>3</sub> and 5-GMP forms precipitates, which is likely due to binding of Gd<sup>3+</sup> with PO<sub>4</sub><sup>3-</sup>. However, this kind of complex is typically stable at a neutral pH, but dissociates to release free

Gd<sup>3+</sup> at an acidic pH, for example, in the tumor microenvironment or intracellular endosome-lysosomal environment. Release of free Gd<sup>3+</sup> has been a big concern for the Gd based contrast agent. However, there is a lack of stability study at a low pH. Moreover, even at a neutral pH, with endogenous metals such as Cu<sup>2+</sup>, Zn<sup>2+</sup>, theoretically, transmetalation can occur, specifically for this type of acyclic, less stable Gd<sup>3+</sup> chelates, to release Gd<sup>3+</sup>, which has been well documented in the literature and release of Gd<sup>3+</sup> most likely accounts for Gd based contrast agents-induced nephrogenic systemic fibrosis in clinic. It is also unclear how the Gd-GMP complex coordinates with hemin and if the iron remains within the ring and interacting with Cl<sup>-</sup> after the complex formation. The stability of this Gd nanoparticle is a serious concern, which has been raised previously, but still lacks of clarity in this revision.

2. The intratumoral biodistribution and the fate of the Gd nanoparticles are still vague. It seems based on the scheme in Fig. 1 that the nanoparticles are internalized in tumor cells. What mechanisms for tumor cells not stromal cells such as macrophages to take up the nanoparticles? It would be interesting to see the cellular uptake by co-culturing tumor cells with macrophages and dosed with the Gd nanoparticle in vitro. In vivo data of intratumoral biodistribution are also lacking. Immunofluorescence staining of co-localization of the nanoparticle with tumor cells not stromal cells will be helpful.

3. The authors showed the nanoparticles likely entering the lysosome in Fig. 3. Related to the previous question, are they still stable at the extreme acidic environment in lysosome?

4. The authors had some discussion regarding how this agent differs from similar radiosensitizers such as AGuIX, indicating that the hemin is endogenous and used as a therapeutic agent, thus the Hemin Gd nanoparticles are biocompatible and biologically safer. This conclusion is not correct because the safety of this agent is highly related to the stability of Gd<sup>3+</sup> in the complex.

5. From the MR images in Fig. 4, there seems extensive signal enhancement in abdominal organs at 24h up to 48h, which may suggest the catabolism of the agents in digestive organs, but surprisingly, there was no signal increase in liver. The biodistribution and metabolism of this agent remain unclear.

6. The authors clarified the irradiation dosing and schedule. The RT schedule with 2 doses of 6 Gy delivered 6 days apart does not seem a clinically relevant dose schedule. Any rationale for it?

7. The new data in Suppl Fig. 6 presented the cytotoxicity of the agent with RT in CT26 cancer cells. What was the RT dose? Similar studies with macrophages will be helpful to support the in vivo observations showing the treatment had no effect on TAM.

8. It is not clear if the flow data in Supple Fig. 18 were after fully eliminating the dead cells. Provisions of more detailed gating strategy and methodology of flow cytometry are necessary.

## Response to Referees

Dear Reviewers:

Thanks a lot for your constructive comments to our manuscript entitled “Nanoscale coordination polymers induce immunogenic cell death by amplifying radiation therapy mediated oxidative stress” (ID: NCOMMS-20-00266A). These comments are very valuable and helpful for us to revise and improve the manuscript. Revised manuscript are marked in yellow in the Manuscript and Supplementary Information, and the point to point response to your comments are listed as following:

### Reviewer #1 (expertise in radiotherapy and immunotherapy):

**Comment 1:** Therefore, to give concrete suggestions, this reviewer would propose deleting: Supplementary Figure 15 / Supplementary Figure 18 / Supplementary Table 2 / Supplementary Figure 19 / Supplementary Table 3 / Supplementary Figure 23 / Supplementary Table 4 / Supplementary Table 5.

Supplementary Figure 25 is a different case. There are clear and discrete populations, and can more reasonably be used.

**Response:** Thanks a lot for your preciseness and carefulness. According to your and editor's constructive suggestions, we removed the flow cytometry raw data (Supplementary Figure 15 / Supplementary Figure 18 / Supplementary Table 2 / Supplementary Figure 19 / Supplementary Table 3 / Supplementary Figure 23 / Supplementary Table 4 / Supplementary Table 5) from Supplementary Information, and provided the quantification data of IHC as **New Supplementary Figure 20 (P11, Line 351-366 of Supplementary Information, marked in yellow).**

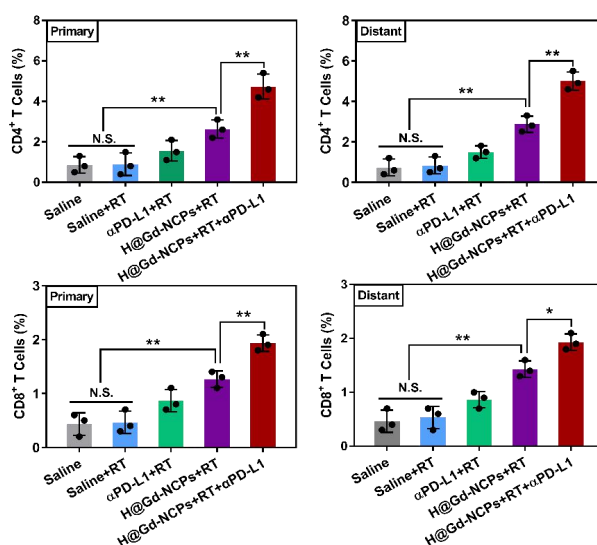

35 **Supplementary Figure 20.** Quantification of CD4<sup>+</sup> T and CD8<sup>+</sup> T cells infiltrated in tumor tissues  
36 based on IHC from Supplementary Figure 19. All data were shown as mean±SD. \**p* < 0.05; \*\**p* <  
37 0.01.

38

39 **Comment 2:** Figure 6e, and description of this on p15 line 485. The western blot does  
40 not show that HMGB1 was released. Total lysates of tumors will show HMGB1 levels,  
41 but cannot distinguish whether it is inside or outside cells. Minor change to clarify  
42 that.

43 **Response:** Thanks for your carefulness. We extracted total protein from tumor tissue  
44 suspensions by Cytoplasmic Protein Extraction kit (Beyotime Biotech, China). This  
45 kit used cytoplasmic protein extraction reagents to fully swell the cells *via* low  
46 osmotic pressure, destroy the cell membrane, release cytoplasmic proteins, and then  
47 remove the nuclear precipitate by centrifugation. Then we clarified that in the  
48 Manuscript as “western blot analysis of CT26 tumor tissues showed that the  
49 extracellular and cytoplasmic HMGB1...”. (P15, Line 490-491 of Manuscript, marked  
50 in yellow), and ‘Western Blot of HMGB1’ was added to the Methods (P32, Line  
51 1064-1071 of Manuscript).

52

53 **Comment 3:** p15 line 510. There are no survival curves in the CT26 tumor work, and  
54 while some tumors have completely regressed at the d21 post-treatment harvest,  
55 without follow-up it is not possible to assign the animals as ‘cured’. Minor change to  
56 ‘tumor free at d21’ or similar.

57 **Response:** Thanks a lot for your preciseness. We have changed the expressions of  
58 ‘cured’ as ‘tumor free at day 21’ in the Manuscript. (P15, line 516-517 of Manuscript).

59

60 **Special thanks to Reviewer #1 for his/her good comments. These comments have**  
61 **significantly improved the quality of this paper.**

62

63 **Reviewer #3 (expertise in nanoparticles):**

64 **Comment 1:** ① The authors provided additional data showing the stability of the  
65 Hemin-Gd-NCP and no transmetalation occurring both in vitro and in vivo. However,  
66 based on the methodology described, mixture of GdCl<sub>3</sub> and 5-GMP forms precipitates,  
67 which is likely due to binding of Gd<sup>3+</sup> with PO<sub>4</sub><sup>3-</sup>. However, this kind of complex is  
68 typically stable at a neutral pH, but dissociates to release free Gd<sup>3+</sup> at an acidic pH, for

69 example, in the tumor microenvironment or intracellular endosome-lysosomal  
70 environment. Release of free  $Gd^{3+}$  has been a big concern for the Gd based contrast  
71 agent. However, there is a lack of stability study at a low pH.

72 ② Moreover, even at a neutral pH, with endogenous metals such as  $Cu^{2+}$ ,  $Zn^{2+}$ ,  
73 theoretically, transmetalation can occur, specifically for this type of acyclic, less stable  
74  $Gd^{3+}$  chelates, to release  $Gd^{3+}$ , which has been well documented in the literature and  
75 release of  $Gd^{3+}$  most likely accounts for Gd based contrast agents-induced  
76 nephrogenic systemic fibrosis in clinic.

77 ③ It is also unclear how the Gd-GMP complex coordinates with hemin and if the iron  
78 remains within the ring and interacting with  $Cl^-$  after the complex formation. The  
79 stability of this Gd nanoparticle is a serious concern, which has been raised previously,  
80 but still lacks of clarity in this revision.

81 ① **Response:** Thanks very much for your constructive comments, which made us  
82 realize that we should also consider the stability of Gd-NCPs and Hemin@Gd-NCPs  
83 at an acidic pH. Then, we adjusted the pH of  $GdCl_3$ , Gd-NCPs and Hemin@Gd-NCPs  
84 solutions to 7.4, 6.5, 5.0, 4.0, 3.0, 2.0, respectively, incubated for 7 days, and then  
85 added with thymolphthalein complexon (TC) to detect free  $Gd^{3+}$ . Gd-NCPs and  
86 Hemin@Gd-NCPs maintained the coordination state at neutral and weak acidic  
87 ( $pH > 4.0$ ), while  $Gd^{3+}$  in  $GdCl_3$  solution could be easily detected at  $pH 2.0 \sim 7.4$ . When  
88 the pH value was further adjusted to below 3.0,  $Gd^{3+}$  could gradually release from  
89 Gd-NCPs and Hemin@Gd-NCPs for TC detection (Supplementary Figure 29). These  
90 results potentially indicated that Gd-NCPs and Hemin@Gd-NCPs could maintain the  
91 coordination state in the blood circulation, tumor microenvironment and cell  
92 lysosomes. We speculated that the coordination state of Gd in Gd-NCPs and  
93 Hemin@Gd-NCPs was highly related to the pKa of 5'-GMP ( $pK_{a1} = 2.4$ ).  
94 Theoretically, when  $pH > 7.0$ , Gd-NCPs or Hemin@Gd-NCPs maintained a relatively  
95 stable particulate state. As the pH value gradually decreased, the phosphate was  
96 partially mono-protonated ( $4.0 < pH < 6.0$ ), these nanoparticles would still maintain  
97 their particulate or coordination state. When  $pH < 3.0$ , free  $Gd^{3+}$  could be gradually  
98 released from Gd-NCPs or Hemin@Gd-NCPs because of the further protonation of  
99 phosphate groups (Supplementary Figure 30). These results were inserted into the  
100 "Discussion" part (P24, Line 793-810 of Manuscript).

101

102



103  
104  
105  
106  
107  
108  
109  
110  
111  
112  
113  
114  
115  
116  
117

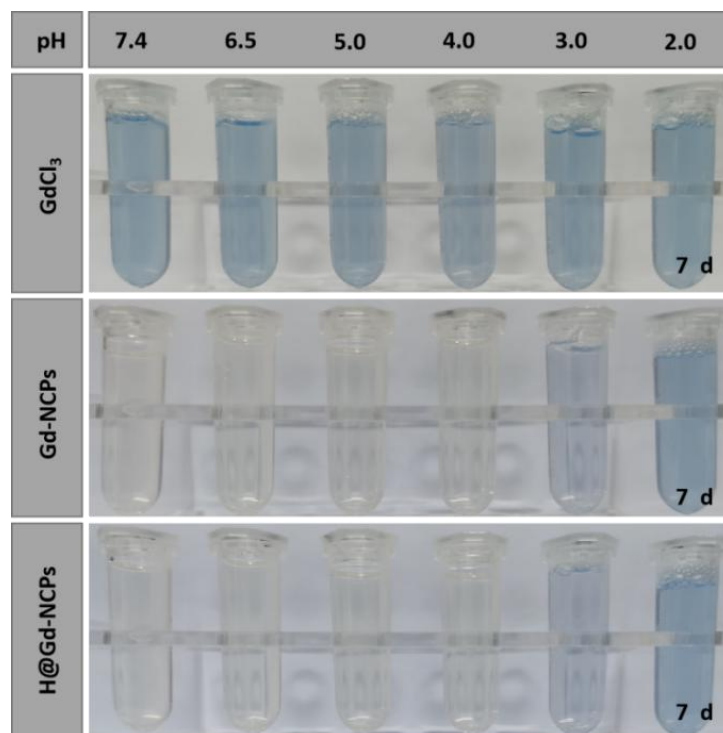

118 **Supplementary Figure 29.** Photographs of free Gd<sup>3+</sup> detection by Thymolphthalein Complexon  
119 (TC) under different pH values.

120  
121  
122  
123  
124  
125  
126  
127  
128  
129  
130  
131

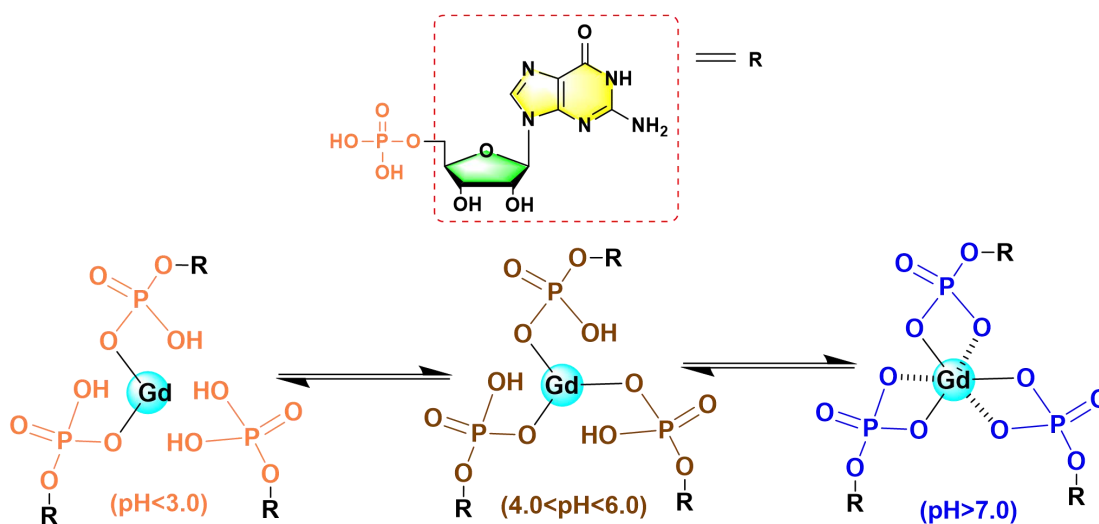

132 **Supplementary Figure 30.** Potential mechanism of the pH dependent degradation process of  
133 Gd-NCPs or Hemin@Gd-NCPs.

134  
135  
136

② To further evaluate whether the Hemin@Gd-NCPs would undergo trans-metallation in physiological conditions, Hemin@Gd-NCPs were packed into

137 dialysis bags, stirred in 100.0 mL dialysates (50% bovine serum, adding extra  
 138  $[\text{Na}^+]=150$  mM,  $[\text{K}^+]=5.0$  mM,  $[\text{Ca}^{2+}]=2.5$  mM,  $[\text{Mg}^{2+}]=1.25$  mM,  $[\text{Zn}^{2+}]=30$   $\mu\text{M}$ ,  
 139  $[\text{Fe}^{3+}]=30$   $\mu\text{M}$ ,  $[\text{Cu}^{2+}]=30$   $\mu\text{M}$  to mimic physiological environment) for 7 days at  
 140  $\text{pH}=7.4$ , 6.5 and 5.0, respectively. The dialysates were collected and concentrated by  
 141 vacuum distillation, and then the concentrates were analyzed by ICP-OES (Avio 500,  
 142 USA). As shown in Supplementary Figure 5, all the above metal ions, except  $\text{Gd}^{3+}$ ,  
 143 could be detected in dialysates at various pH, potentially indicating that obvious  
 144 transmetalation process could not be proven under these applied conditions. These  
 145 results were inserted into P6, Line 189-198 of Manuscript.

146

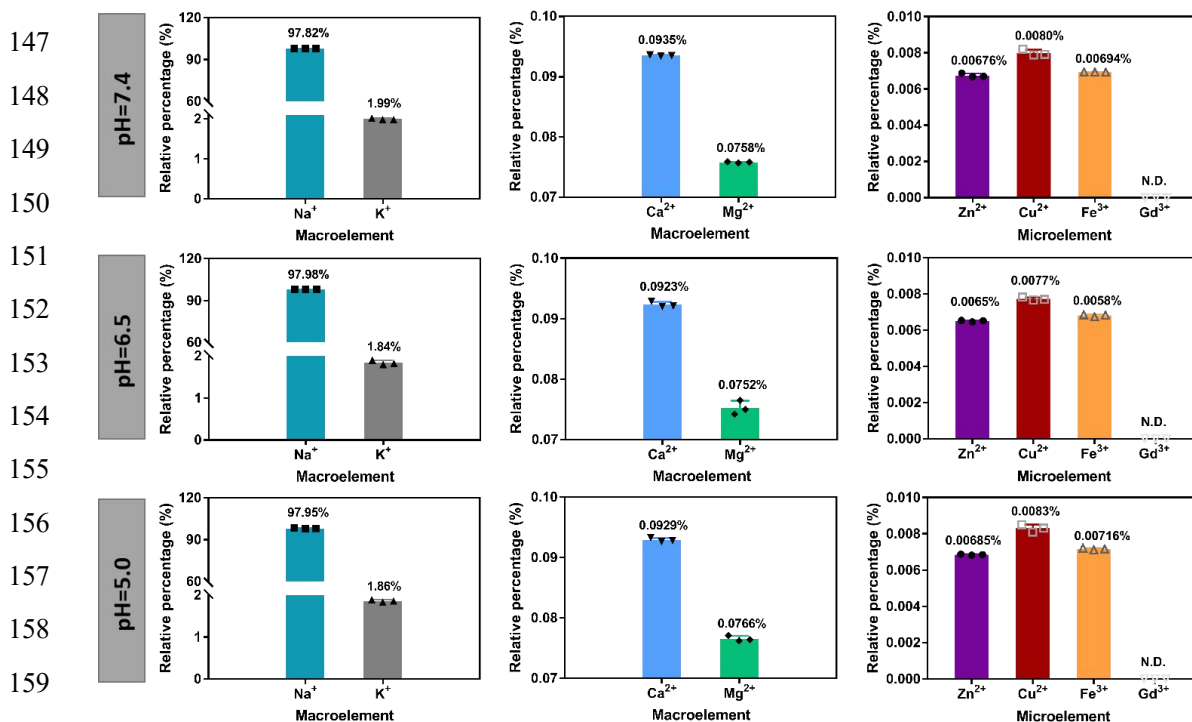

160

161 **Supplementary Figure 5.** Trans-metallation experiments of Hemin@Gd-NCPs at  $\text{pH}=7.4$ , 6.5,  
 162 5.0, respectively. Analysis of metal ion content in trans-metallation dialysates (50% bovine serum,  
 163 adding extra  $[\text{Na}^+]=150$  mM,  $[\text{K}^+]=5.0$  mM,  $[\text{Ca}^{2+}]=2.5$  mM,  $[\text{Mg}^{2+}]=1.25$  mM,  $[\text{Zn}^{2+}]=30$   $\mu\text{M}$ ,  
 164  $[\text{Fe}^{3+}]=30$   $\mu\text{M}$ ,  $[\text{Cu}^{2+}]=30$   $\mu\text{M}$  to mimic physiological environment) *via* ICP-OES.

165

166 We fully understood the reviewer's concerns upon the stability and biosafety of  
 167 Hemin@Gd-NCPs *in vivo*. Through our *in vitro* simulation studies, we speculated that  
 168 Hemin@Gd-NCPs would gradually disintegrate into particulate or coordination state,  
 169 but not free state, after intravenous administration. If a large amount of  $\text{Gd}^{3+}$  was  
 170 released, it might cause obvious damages to normal tissues including kidneys.

171 Therefore, we further evaluated the acute toxicity of Hemin@Gd-NCPs and GdCl<sub>3</sub> in  
 172 healthy Balb/c mice. The mice were randomly divided into three groups (n=3),  
 173 including Saline, GdCl<sub>3</sub> ([Gd<sup>3+</sup>]=3.0 mg kg<sup>-1</sup> × 6) and Hemin@Gd-NCPs ([Gd<sup>3+</sup>]=30.0  
 174 mg kg<sup>-1</sup> × 6, 10 times dose of GdCl<sub>3</sub>). The mice were intravenously injected every day  
 175 for 6 days and sacrificed on day 7, respectively. As shown in Supplementary Figure  
 176 31, mice in GdCl<sub>3</sub> group exhibited obvious weight loss, while those in Saline and  
 177 Hemin@Gd-NCPs groups did not. Serum biochemistry analysis indicated that  
 178 renal function of the mice in GdCl<sub>3</sub> group were probably impaired, but no significant  
 179 difference appeared between Saline and Hemin@Gd-NCPs groups (Supplementary  
 180 Figure 32). Histological changes of kidneys merely occurred in GdCl<sub>3</sub> group, including  
 181 multifocal chronic inflammation and interstitial edema (Supplementary Figure 33),  
 182 which potentially indicated the relatively bio-safety of Hemin@Gd-NCPs. This  
 183 content was inserted into the “Discussion” part (P24, Line 810-826 of Manuscript).

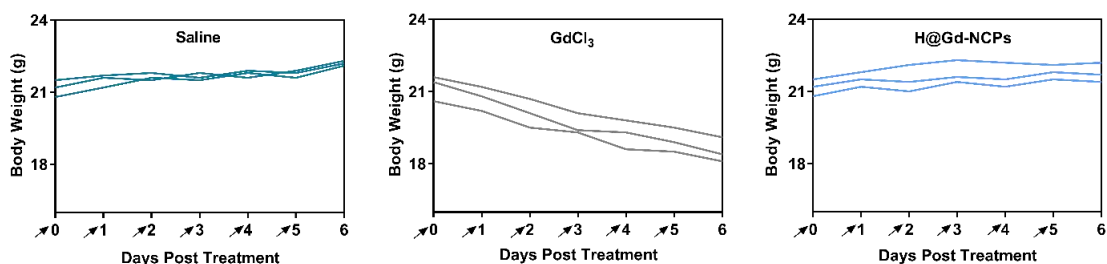

191 **Supplementary Figure 31.** Body weight change curves of individual mouse after different  
 192 treatments.

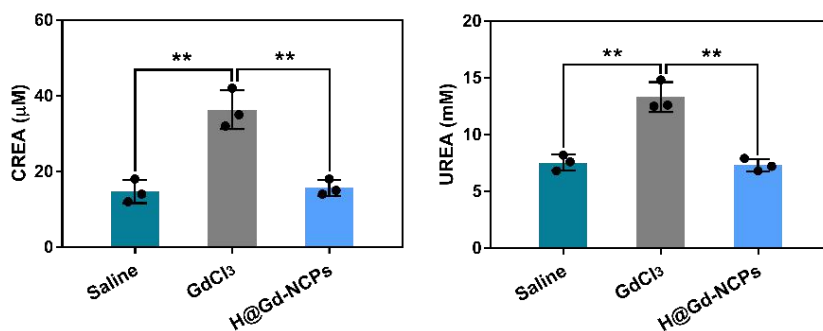

201 **Supplementary Figure 32.** Serum biochemical parameters CT26-bearing mice (n=3) treated with  
 202 Saline, GdCl<sub>3</sub> and Hemin@Gd-NCPs. All data were shown as mean±SD. \*\**p* < 0.01.

205  
206  
207  
208  
209  
210  
211

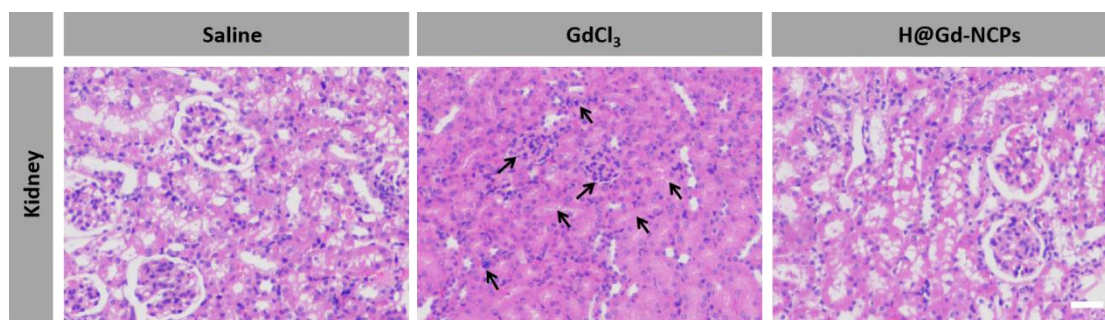

212 **Supplementary Figure 33.** H&E stain sections of kidneys treated with Saline, GdCl<sub>3</sub> and  
213 Hemin@Gd-NCPs. Scale bar=50 μm.

214

215 ③ Thanks for your constructive suggestions, which enabled us to investigate the  
216 encapsulated mechanism of Hemin@Gd-NCPs. In previous study, Prof. Qu and  
217 co-workers exhibited the schematic illustration of coordination polymer nanoparticles  
218 formation through the self-assembly of 5'-GMP and lanthanide ions, such as Eu<sup>3+</sup>.  
219 N-methylmesoporphyrin IX (NMM) was confined by π-π stacking in the nanoscale  
220 adaptive supramolecular networks (Scheme 1)<sup>1</sup>. Hemin (Iron protoporphyrin IX) and  
221 NMM (N-methylmesoporphyrin IX) exhibited very similar structures and properties.  
222 Therefore, we speculated that our established Hemin@Gd-NCPs would exhibit a  
223 similar structure with NMM@Eu<sup>3+</sup>/5'-GMP, and Hemin was probably encapsulated in  
224 the large ring formed by Gd<sup>3+</sup> and 5'-GMP *via* π-π stacking. We therefore updated the  
225 new Fig. 1a (P3, Line 79-95). This content was inserted into the “Discussion” part  
226 (P23, Line 761-769 of Manuscript).

227

228

229

230

231

232

233

234

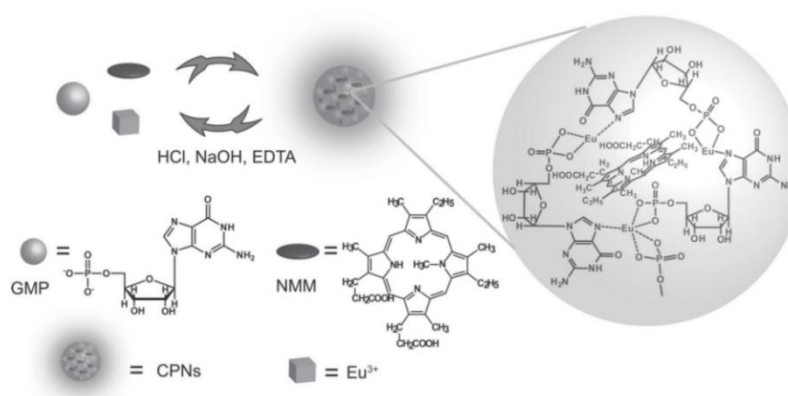

235 **Scheme 1.** Schematic illustration of coordination polymer nanoparticles formation through the  
236 self-assembly of GMP and lanthanide ions. NMM was confined in the adaptive supramolecular  
237 networks and showed intense luminescence. The properties were used to construct versatile logic  
238 gates. From *Adv. Mater.* **26**, 1111-1117 (2014).

239 [1] Pu, F., et al. Multiconfigurable Logic Gates Based on Fluorescence Switching in Adaptive  
240 Coordination Polymer Nanoparticles. *Adv. Mater.* **26**, 1111-1117 (2014).

241

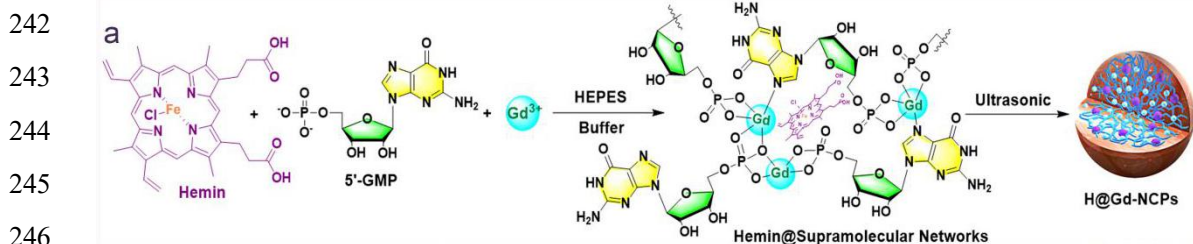

247 **Fig. 1** (a) Schematic illustration of preparation of nanoscale coordination polymers  
248 Hemin@Gd-NCPs.

249

250 We further detected the existence of iron and chlorine after the complex  
251 formation by the X-ray photoelectron spectroscopy (XPS). As shown in  
252 Supplementary Figure 4, metal element Gd with characteristic binding energy at  
253 148.00 eV (Gd 4d<sub>3/2</sub>) and Fe with characteristic binding energy at 711.75 eV (Fe 2p<sub>3/2</sub>),  
254 were consistent with standard XPS spectrum of Gd<sup>3+</sup> and Fe<sup>3+</sup> (NIST XPS Database).  
255 Other non-metallic elements such as C, N, O, Cl could also be detected in Hemin or  
256 Hemin@Gd-NCPs (Fig. 2f and Supplementary Figure 4). These results demonstrated  
257 that Hemin molecules could remain their integrity during the complex formation. This  
258 content was inserted into P6, Line 174-178 of Manuscript.

259

260

261

262

263

264

265

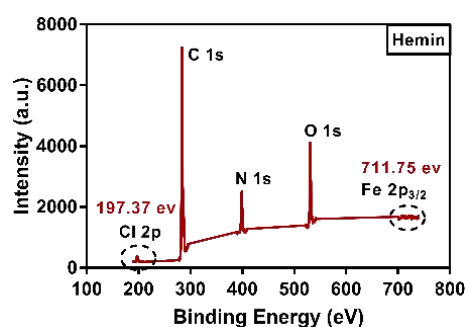

266 **Supplementary Figure 4.** Qualitative element analysis of Hemin by X-ray photoelectron  
267 spectroscopy (XPS).

268

269 **Comment 2:** The intratumoral biodistribution and the fate of the Gd nanoparticles are  
270 still vague. It seems based on the scheme in Fig. 1 that the nanoparticles are  
271 internalized in tumor cells. What mechanisms for tumor cells not stromal cells such as  
272 macrophages to take up the nanoparticles? It would be interesting to see the cellular

273 uptake by co-culturing tumor cells with macrophages and dosed with the Gd  
274 nanoparticle *in vitro*. *In vivo* data of intratumoral biodistribution are also lacking.  
275 Immunofluorescence staining of co-localization of the nanoparticle with tumor cells  
276 not stromal cells will be helpful.

277 **Response:** We are very sorry to confuse the reviewer. We provided the schematic  
278 diagram as Fig. 1 to exhibit the internalization process of Hemin@Gd-NCPs by tumor  
279 cells to induce immunogenic cell death during radiation therapy. Actually, most of the  
280 cells (*e.g.* tumor cells, macrophages, etc) within tumor tissues could uptake these  
281 nanoparticles, hence we did not mention that Hemin@Gd-NCPs would be specifically  
282 internalized by tumor cells in the manuscript. We deeply believed that the reviewer's  
283 question was very interesting, so we further compared the internalization efficiency of  
284 Hemin@Gd-NCPs between tumor cells and macrophages. We co-cultured tumor cells  
285 and macrophages, dosed with Hemin@Gd-NCPs (Red) for 6 hours, and then labelled  
286 macrophages with PE-F4/80-antibody (Yellow). As shown in Supplementary Figure  
287 24, CT26 tumor cells exhibited obviously stronger red punctate fluorescence signals,  
288 potentially indicating their higher internalization efficiency than macrophages  
289 (RAW264.7 cells). This content was inserted into P20, Line 667-678 of Manuscript  
290 and marked in yellow.

291 MR imaging (Fig. 4) of Hemin@Gd-NCPs *in vivo* demonstrated their intratumoral  
292 biodistribution, and the dynamic concentrations of Hemin@Gd-NCPs detected in the  
293 tumor tissues (Supplementary Figure 8) also qualitatively confirmed their  
294 accumulation.

295

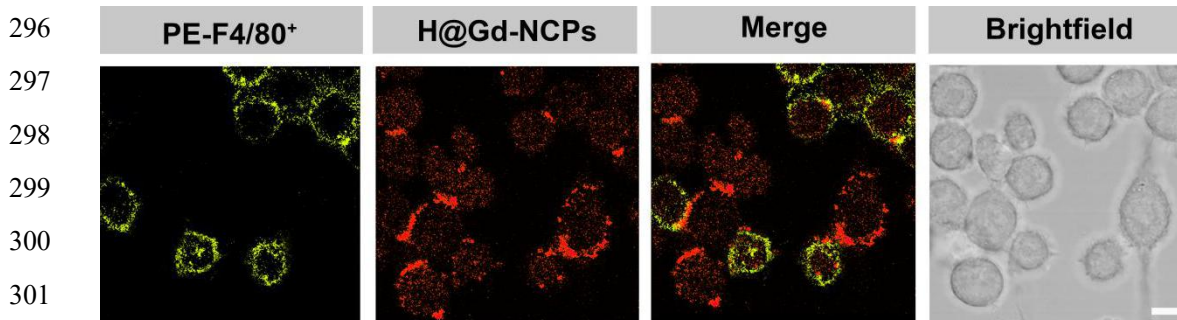

302

303 **Supplementary Figure 24.** Confocal laser scanning microscope (CLSM) images of co-cultured  
304 CT26 and RAW264.7 cells after treatment with PE-F4/80<sup>+</sup> and Hemin@Gd-NCPs, respectively.  
305 Scale bar=10  $\mu$ m.

306

307 **Comment 3:** The authors showed the nanoparticles likely entering the lysosome in  
308 Fig. 3. Related to the previous question, are they still stable at the extreme acidic  
309 environment in lysosome?

310 **Response:** As shown in Supplementary Figure 29 and 30, Gd-NCPs and  
311 Hemin@Gd-NCPs could maintain the particulate or coordination state at pH>4.0, and  
312 release free Gd<sup>3+</sup> at pH<3.0. Therefore, we believed that these nanoparticles would  
313 present in the particulate or coordination state, but not in free state, when located  
314 within acidic lysosomes at pH 5.0~6.0.

315

316 **Comment 4:** The authors had some discussion regarding how this agent differs from  
317 similar radiosensitizers such as AGuIX, indicating that the hemin is endogenous and  
318 used as a therapeutic agent, thus the Hemin Gd nanoparticles are biocompatible and  
319 biologically safer. This conclusion is not correct because the safety of this agent is  
320 highly related to the stability of Gd<sup>3+</sup> in the complex.

321 **Response:** Thanks a lot for your reminder. Hemin (PANHEMATIN<sup>®</sup>) was approved  
322 by FDA for injection prescription medication to relieve repeated attacks of acute  
323 intermittent porphyria (AIP). Hemin was supplied as lyophilized powder in free state  
324 for reconstitution with sterile water just before infusion. These information indicated  
325 that Hemin in free state displayed acceptable compatibility for *in vivo* administration.  
326 Furthermore, acute toxicity study also confirmed the biological safety of  
327 Hemin@Gd-NCPs even at higher cumulative dose ([Gd<sup>3+</sup>]=180 mg/kg). Based on  
328 these theoretical analysis and experimental results, we believed that Gd-NCPs and  
329 Hemin@Gd-NCPs exhibited acceptable biological safety and compatibility for *in vivo*  
330 antitumor treatment.

331 Here, we must express our apology for confusion. In the Discussion (Previous P23  
332 Line 749-750), we mentioned "... biological safety and biocompatibility were also  
333 worthy of our consideration". We originally expressed that Gd-NCPs and  
334 Hemin@Gd-NCPs potentially exhibited comparable and acceptable biological safety  
335 to other Gd-based coordination molecules. This sentence might confuse the reviewer  
336 and other readers, therefore we deleted this sentence from Discussion.

337

338 **Comment 5:** From the MR images in Fig. 4, there seems extensive signal  
339 enhancement in abdominal organs at 24h up to 48h, which may suggest the  
340 catabolism of the agents in digestive organs, but surprisingly, there was no signal

341 increase in liver. The biodistribution and metabolism of this agent remain unclear.

342 **Response:** Thanks for your constructive comments. We discussed with professional  
343 radiologist, and obtained that gastrointestinal contents, including biological  
344 macromolecules and gas, and the visceral fat surrounding gastrointestinal organs  
345 would quickly realign its longitudinal magnetization with B<sub>0</sub>, and exhibit extremely  
346 strong MRI signal<sup>2-5</sup>. Therefore, the extensive signal enhancement in abdominal  
347 organs from 24 h to 48 h, were not induced by Hemin@Gd-NCPs. Similar situations  
348 also happened on tumor (2 h, 6 h), kidney (6 h, 12 h) in Magnevist group, and tumor  
349 (2 h, 6 h) in Hemin@Gd-NCPs group, respectively.

350 Besides, some Gd-based coordination molecules or nanoparticles exhibited weak  
351 uptake in the liver tissues, which has been previously reported by Roux and  
352 co-workers<sup>6</sup>. This phenomenon could be attributed to that the Gd-based nanoparticles  
353 could not be effectively phagocytosed by kuffer cells within the liver tissues.  
354 Therefore, some studies had modified Gd-based nanocarriers with targeting ligands to  
355 improve their phagocytic capacity. In our studies, it was also shown that macrophages  
356 (RAW264.7 cells) were obviously weaker than tumor cells in phagocytosis of  
357 Hemin@Gd-NCPs. Therefore, we speculated that insufficient phagocytosis of kuffer  
358 cells upon Magnevist or Hemin@Gd-NCPs might be the potential reason of their low  
359 accumulation within liver tissues.

360 [2] Mao, J., et al. Fat tissue and fat suppression. *J. Magn. Reson. Imaging*. **11**, (3) 385-93 (1993).

361 [3] Delfaut E. M., et al. Fat suppression in MR imaging: techniques and pitfalls. *Radiographics*.  
362 **19**, (2) 373-82 (1999).

363 [4] De Kerviler E., et al. Fat suppression techniques in MRI: an update. *Biomed. Pharmacother*. **52**,  
364 (2) 69-75 (1998).

365 [5] Bley, T. A., et al. Fat and water magnetic resonance imaging. *J. Magn. Reson. Imaging*. **31**,  
366 4-18 (2010).

367 [6] Alric, C., et al. Gadolinium Chelate Coated Gold Nanoparticles As Contrast Agents for Both  
368 X-ray Computed Tomography and Magnetic Resonance Imaging. *J. Am. Chem. Soc.* **130**, (18)  
369 5908-5915 (2008).

370

371 **Comment 6:** The authors clarified the irradiation dosing and schedule. The RT  
372 schedule with 2 doses of 6Gy delivered 6 days apart does not seem a clinically  
373 relevant dose schedule. Any rationale for it?

374 **Response:** Hypofractionated radiotherapy (3~8 Gy per fraction) had comparable local



375 control capacity and side effects to standard fractionation, which was confirmed by a  
376 number of clinical studies. In clinical practices, tumor patients sometimes received  
377 hypofractionated radiotherapy to defense tumors, which had been widely used for  
378 breast, bladder, thyroid and prostate cancer treatments<sup>7-11</sup>. In our study, radiation (RT  
379 6 Gy ×2 delivered 6 days apart) was performed to treat tumor-bearing mice. At the  
380 same time, similar treatment patterns (RT 10 Gy ×2 delivered a week apart and RT 5  
381 Gy ×2 delivered three days apart) often appeared in preclinical studies<sup>12,13</sup>.

382 [7] Sanz, J. et al. Once-Weekly Hypofractionated Radiotherapy for Breast Cancer in Elderly  
383 Patients: Efficacy and Tolerance in 486 Patients (*Clinical Study*). *Biomed Res Int*. 8321871 (2018).

384 [8] Zhao, M. et al. Weekly radiotherapy in elderly breast cancer patients: a comparison between  
385 two hypofractionation schedules. *Clinical and Translational Oncology*. [https://doi.org/](https://doi.org/10.1007/s12094-020-02430-7)  
386 10.1007/s12094-020-02430-7.

387 [9] Mallick, I., et al. A Phase I/II Study of Stereotactic Hypofractionated Once-weekly Radiation  
388 Therapy (SHORT) for Prostate Cancer. *Clinical Oncology*. e39-e45 (2020).

389 [10] Dirix, P., et al. Hypofractionated palliative radiotherapy for bladder cancer. *Support Care*  
390 *Cancer*. **24**, 181-186 (2016).

391 [11] Harriet, E.-H., et al. Patient-Reported Outcomes and Cosmesis After Once-Weekly  
392 Hypofractionated Breast Irradiation in Medically Underserved Patients. *Int. J. Radiation Oncol.*  
393 *Biol. Phys.* **107**, 934-942 (2020).

394 [12] Oweida, A., et al. Hypofractionated Radiotherapy Is Superior to Conventional Fractionation  
395 in an Orthotopic Model of Anaplastic Thyroid Cancer. *Thyroid* **28** (6), 739-747 (2017).

396 [13] Gao S, et al. Selenium-Containing Nanoparticles Combine the NK Cells Mediated  
397 Immunotherapy with Radiotherapy and Chemotherapy. *Adv. Mater.* **32**, 1907568 (2020).

398

399 **Comment 7:** The new data in Suppl Fig. 6 presented the cytotoxicity of the agent  
400 with RT in CT26 cancer cells. What was the RT dose? Similar studies with  
401 macrophages will be helpful to support the *in vivo* observations showing the treatment  
402 had no effect on TAM.

403 **Response:** The dose of RT was 8 Gy, which had been added in the methods of *in vitro*  
404 cytotoxicity and cloning experiments. According to the reviewer's constructive  
405 suggestions, we then performed the *in vitro* cytotoxicity study upon tumor cells and  
406 macrophages, respectively. Without radiation, Hemin@Gd-NCPs (0~100 μM of Gd<sup>3+</sup>)  
407 did not exhibit obvious cytotoxicity to both CT26 tumor cells and RAW264.7 cells,  
408 potentially indicating their great biocompatibility. Upon radiation, Hemin@Gd-NCPs

409 showed superior proliferation inhibition in CT26 tumor cells than RAW264.7 cells,  
410 which should be probably attributed to their higher cellular internalization  
411 (Supplementary Figure 24, 25). This content was inserted into P20, Line 667-678 of  
412 Manuscript.

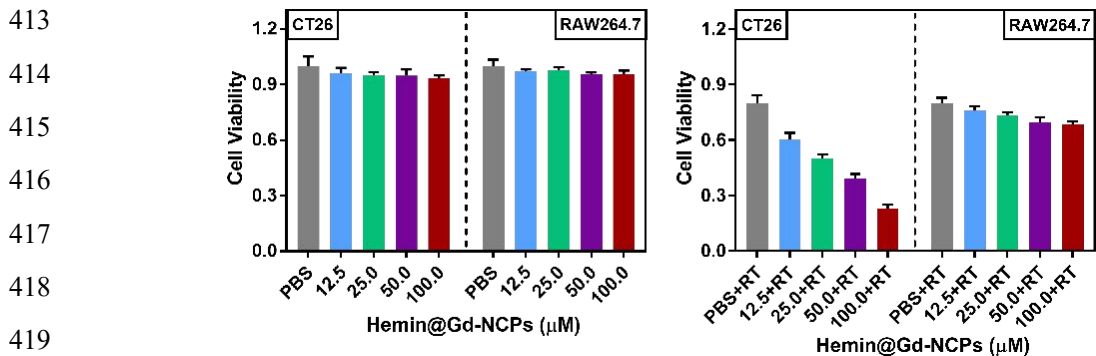

420 **Supplementary Figure 25.** The cytotoxicity of Hemin@Gd-NCPs against CT26 and RAW264.7  
421 cells with or without radiation (8 Gy ×1), respectively ([Gd<sup>3+</sup>]=0, 12.5, 25, 50, 100 μM, n=3). This  
422 experiment was repeated twice independently with similar results and all data were shown as  
423 mean±SD.

424

425 **Comment 8:** It is not clear if the flow data in Supple Fig. 18 were after fully  
426 eliminating the dead cells. Provisions of more detailed gating strategy and  
427 methodology of flow cytometry are necessary.

428 **Response:** In this study, all of the flow cytometry experiments were adopted with the  
429 same sample treatment method and gating strategy. After incubated with various  
430 antibodies, cells were fixed by 4% paraformaldehyde and then analysed *via* flow  
431 cytometry. During the the running process, Forward Scatter (FSC) and Side Scatter  
432 (SSC) dot maps were established, the voltage was adjusted to ensure that all the  
433 events were within the visible range of the dot maps. Then, the events with  
434 appropriate FSC (200-600) and SSC (200-600) were gated and collected. Those  
435 events with low FSC/low SSC and low FSC/high SSC were abandoned, which mainly  
436 represented cell debris and air bubbles. This content was inserted into P32, Line  
437 1073-1080 of Manuscript.

438

439 **Special thanks to Reviewer #3 for his/her good comments. These comments have**  
440 **significantly improved the quality of this paper.**

441

442 We tried our best to improve the manuscript and made some modifications in the

443 manuscript. These changes will not influence the content and framework of the  
444 manuscript. And we marked these changes in yellow in revised manuscript.

445 We appreciate for Reviewers' warm work earnestly, and hope that these corrections  
446 will meet with approval.

447 Once again, thank you very much for your comments and suggestions. These  
448 comments have significantly improved the quality of our manuscript.

449

450 Best Regards

451 Yiqiao Hu PhD, Professor

452 School of Life Science and Medical School of Nanjing University, Nanjing University,  
453 Nanjing 210093, China.

454 Tel: +86-25-83596143; E-mail: huyiqiao@nju.edu.cn.

## REVIEWER COMMENTS

Reviewer #3 (Remarks to the Author):

The authors have made significant revisions to this manuscript with additional data and extended discussion. They have extensively addressed the concerns and improved clarity. There are some remaining concerns as follows.

- 1). Experimental details need be provided in the figure captions or the main text for clarity, although some of them can be found in the Methods. For example, what radiation dose given in Fig. 6, and when immunological assays were conducted in Figs. 6 and 7.
- 2). The authors' response to MRI signals detected in the abdominal organs/tissues is vague. The signal enhancement was not seen in digestive tissues at baseline with either magnevist or Hemin Gd, but massive enhancement at later times, 24h and 48 h in the Hemin group, suggesting the enhancement was likely caused by the contrast agent, not intrinsic factors. As expected, the small molecule magnevist induced tissue contrast at earlier times, 2h and 6h. There is a lack of details about MRI sequences in the Method.
- 3). The data in Fig. 7 showed that both CD4+ and CD8+ T cells increased after the combination treatment. Radiation with/without immune checkpoint blockade has been reported to induce regulatory CD4+T cells or MDSC to hamper anticancer immune response. Was there any change in the population of CD4+ regulatory T cells after treatment?

## Response to Referee

Dear Reviewer #3:

Thanks a lot for your constructive comments to our manuscript entitled “Nanoscale coordination polymers induce immunogenic cell death by amplifying radiation therapy mediated oxidative stress” (ID: NCOMMS-20-00266B). These comments are very valuable and helpful for us to revise and improve the manuscript. Revised manuscript are marked in yellow in the Manuscript and Supplementary Information, and the point to point response to your comments are listed as following:

### **Reviewer #3 (expertise in nanoparticles and radioimmunotherapy):**

**Comment 1:** Experimental details need be provided in the figure captions or the main text for clarity, although some of them can be found in the Methods. For example, what radiation dose given in Fig. 6, and when immunological assays were conducted in Figs. 6 and 7.

**Response:** According to your constructive comments, we have added this detailed information in figure captions of Figs. 6, 7 and 8 or main text. All changes were marked in yellow (P14-17, and P20 of Manuscript).

**Comment 2:** The authors' response to MRI signals detected in the abdominal organs/tissues is vague. The signal enhancement was not seen in digestive tissues at baseline with either magnevist or Hemin Gd, but massive enhancement at later times, 24 h and 48 h in the Hemin group, suggesting the enhancement was likely caused by the contrast agent, not intrinsic factors. As expected, the small molecule magnevist induced tissue contrast at earlier times, 2 h and 6 h. There is a lack of details about MRI sequences in the Method.

**Response:** We appreciate the reviewer for the comments. To clarify whether the abdominal organs/tissues MRI signals came from Magnevist or Hemin@Gd-NCPs, we further retrospectively MR imaging of CT26-bearing mice without any treatment. During the MR Imagine (Fig. 1), we performed a total of 12 scans from lower to upper abdomen of the mouse, with an interval of 1mm between each scan. The detailed parameters used for T1-weighted imaging were as follows: flip angle=180, TR=500 ms, TE=15.0 ms, FOV=3×3, matrix=256×256, SI=1.0 mm 1.0 mm<sup>-1</sup>, averages=3, slices=12, NEX=1 (P30, Line 1024-1026 of Manuscript). As shown in Fig. 1, the gastrointestinal tracts and their contents of untreated CT26-bearing mouse,

35 including biological macromolecules, gas, and the visceral fat, sequentially exhibited  
36 obvious MR signals (Slices 4<sup>th</sup>-10<sup>th</sup>). Since the location, fat contents and  
37 gastrointestinal contents of each mouse were possibly different, there would be some  
38 differences in their MR signals. For instance, the mouse had not yet been injected  
39 with drugs at 0 h (Fig. 4 in Manuscript, Liver imaging in the Hemin@Gd-NCPs  
40 group), exhibiting obvious MR signal of the intestine. Herein, we added the detailed  
41 MRI parameters in the Method (P30, Line 1024-1026 of Manuscript). Thanks again  
42 for the Reviewer's comments.

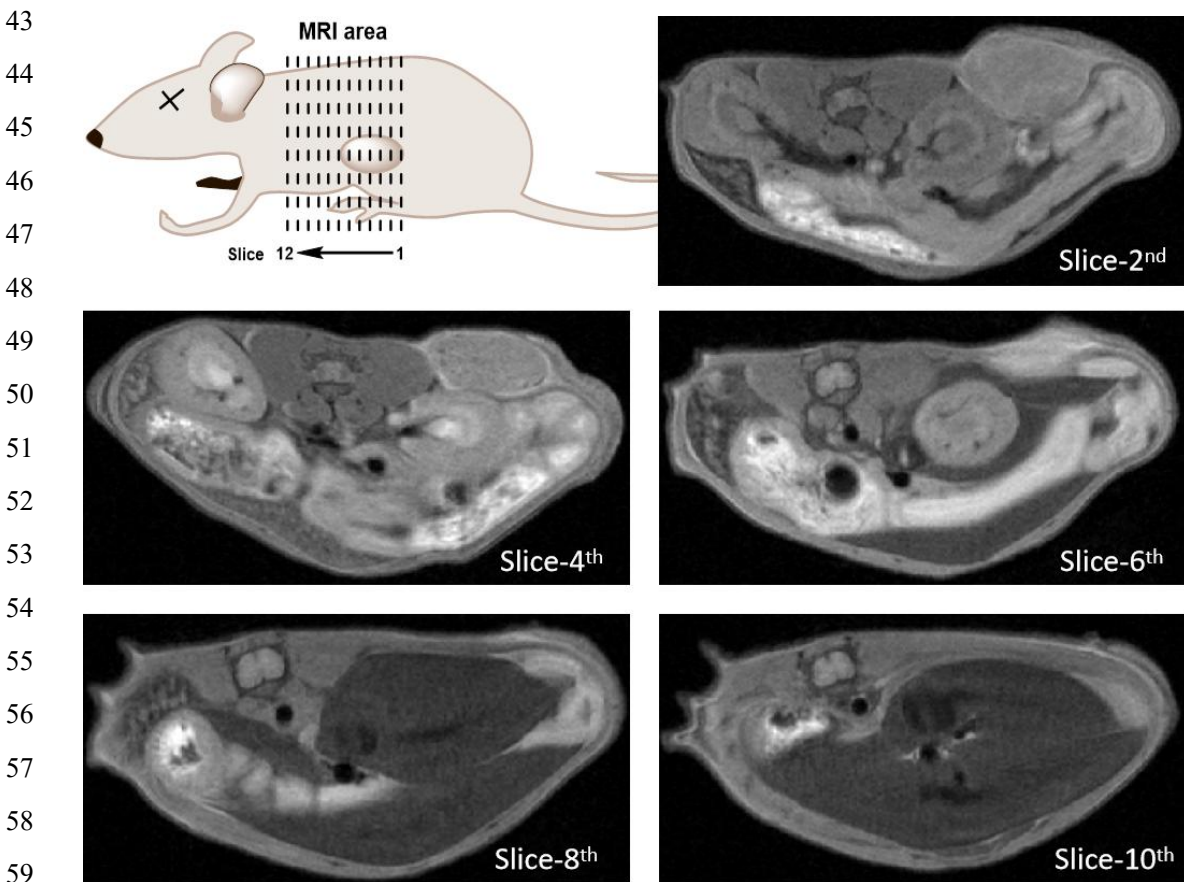

60 **Figure 1.** Schematic illustration of the MRI methodology and the MR imaging of untreated  
61 CT26-bearing mice under different slices.

62

63 **Comment 3:** The data in Fig. 7 showed that both CD4<sup>+</sup> and CD8<sup>+</sup> T cells increased  
64 after the combination treatment. Radiation with/without immune checkpoint blockade  
65 has been reported to induce regulatory CD4<sup>+</sup> T cells or MDSC to hamper anticancer  
66 immune response. Was there any change in the population of CD4<sup>+</sup> regulatory T cells  
67 after treatment?

68 **Response:** We appreciate for the reviewer's insightful and forward-looking comments.

69 At the beginning of our study, we envisioned the use of Hemin@Gd-NCPs to amplify  
70 radiotherapy-mediated oxidative stress for immunogenic cell death induction and  
71 CD8<sup>+</sup> T-cell activation.<sup>1-7</sup> The experimental results also further demonstrated that the  
72 depletion of CD8<sup>+</sup> T cells almost completely eliminated the therapeutic effects of  
73 Hemin@Gd-NCPs+RT in distal tumors (Fig. 8 in the Manuscript). Unexpectedly, we  
74 found that amplified oxidative stress also improved the CD4<sup>+</sup> T-cell infiltration in  
75 tumor microenvironment (Fig. 7 in the Manuscript). In our another study  
76 (unpublished) to amplify radiotherapy mediated oxidative stress, enhanced CD4<sup>+</sup>  
77 T-cell infiltration was also observed, which indicated that this phenomenon was not  
78 isolated or accidental.

79 Except for immune activation,<sup>8-12</sup> radiotherapy would also recruit  
80 immunosuppressive cells, including Tregs and MDSCs, to mediate  
81 radioresistance.<sup>13-17</sup> Tregs usually account for ~4% and 20%-30% of CD4<sup>+</sup> T cells in  
82 normal tissues and tumor microenvironment, respectively.<sup>18-20</sup> High level Tregs in the  
83 tumor microenvironment are associated with poor prognosis in many cancers, which  
84 indicates that Tregs could suppress T<sub>eff</sub> cells and their immune responses.<sup>21-24</sup>

85 Here, we must say that the reviewer's speculation was very insightful and  
86 forward-looking. When the enhanced infiltration of CD4<sup>+</sup> T cells in bilateral tumor  
87 model was observed, we also realized that Tregs might play a role in hindering the  
88 immune response in tumor microenvironment. Subsequently, in the 4T1 metastatic  
89 breast cancer model, we further synergized with the Treg-cell targeting antibody  
90 αCTLA-4, which could also obviously extend the survival of mice treated by  
91 Hemin@Gd-NCPs+RT (Fig. 9 in the Manuscript). Therefore, we cautiously  
92 speculated that Hemin@Gd-NCPs mediated oxidative stress amplification might  
93 enhance Treg-cell infiltration in the tumor microenvironment, thereby inducing  
94 potential immunosuppression.

95 Many thanks again for the very meaningful comments, which pointing out the  
96 direction of our future studies. This discussion have been added in P25-26, Line  
97 857-865 of Manuscript. We intend to verify the dynamic change profiles of Tregs and  
98 pharmacologically deplete Tregs during the process of amplifying oxidative stress in  
99 the future studies for synergistic treatment. That would be another very interesting  
100 area.

101 [1] Pluhar, G. E., et al. CD8<sup>+</sup> T Cell-Independent Immune-Mediated Mechanisms of Anti-Tumor  
102 Activity. *Crit. Rev. Immunol.* **35**, 153-172 (2015).

- 103 [2] Farhood, B., et al. CD8<sup>+</sup> cytotoxic T lymphocytes in cancer immunotherapy: A review. *J. Cell.*  
104 *Physiol.* **234**, 8509-8521 (2019).
- 105 [3] Raskov, H., et al. Cytotoxic CD8<sup>+</sup> T cells in cancer and cancer immunotherapy. *Br. J. Cancer*  
106 (2020). <https://doi.org/10.1038/s41416-020-01048-4>.
- 107 [4] Dudley M. E., et al. Randomized selection design trial evaluating CD8<sup>+</sup>-enriched versus  
108 unselected tumor-infiltrating lymphocytes for adoptive cell therapy for patients with melanoma. *J*  
109 *Clin Oncol.* **31**, 2152-2159 (2013).
- 110 [5] Klein-Hessling S., et al. NFATc1 controls the cytotoxicity of CD8<sup>+</sup> T cells. *Nat. Commun.* **8**,  
111 511 (2017).
- 112 [6] Egelston C. A., et al. Human breast tumor-infiltrating CD8<sup>+</sup> T cells retain polyfunctionality  
113 despite PD-1 expression. *Nat. Commun.* **9**, 4297 (2018).
- 114 [7] Leclerc, M., et al. Regulation of antitumour CD8 T-cell immunity and checkpoint blockade  
115 immunotherapy by Neuropilin-1. *Nat. Commun.* **10**, 3345 (2019).
- 116 [8] Delaney, G., et al. The role of radiotherapy in cancer treatment: estimating optimal utilization  
117 from a review of evidence-based clinical guidelines. *Cancer* **104**, 1129-1137 (2005).
- 118 [9] Demaria, S., et al. Radiotherapy: changing the game in immunotherapy. *Trends Cancer* **2**,  
119 286-294 (2016).
- 120 [10] Brooks, E. D.; Chang, J. Y. Time to abandon single-site irradiation for inducing abscopal  
121 effects. *Nat. Rev. Clin. Oncol.* **16**, 123-135 (2019).
- 122 [11] Barker, H., Paget, J., Khan, A.; Harrington, K. J. The tumour microenvironment after  
123 radiotherapy: mechanisms of resistance and recurrence. *Nat. Rev. Cancer* **15**, 409-425 (2015).
- 124 [12] Rodriguez-Ruiz1, M. E., et al. Immunological impact of cell death signaling driven by  
125 radiation on the tumor microenvironment. *Nat. Immunol.* **21**, 120-134 (2020).
- 126 [13] Oweida A. J., Darragh L., Phan A., et al. STAT3 modulation of regulatory T cells in response  
127 to radiation therapy in head and neck cancer. *J. Natl. Cancer I.* **111**, 1339-1349 (2019).
- 128 [14] Oweida A., Hararah M. K., Phan A., et al. Resistance to radiotherapy and PD-L1 blockade is  
129 mediated by TIM-3 upregulation and regulatory T-cell infiltration. *Clin. Cancer Res.* **24**,  
130 5368-5380 (2018).
- 131 [15] Mondini M., Loyher P. L., Hamon P., et al. CCR2-dependent recruitment of Tregs and  
132 monocytes following radiotherapy is associated with TNF $\alpha$ -mediated resistance. *Cancer Immunol.*  
133 *Res.* **7**, 376-387 (2019).
- 134 [16] Muroyama Y., Nirschl T. R., Kochel C. M., et al. Stereotactic radiotherapy increases  
135 functionally suppressive regulatory T cells in the tumor microenvironment. *Cancer Immunol. Res.*  
136 **5**, 992-1004 (2017).



- 137 [17] Beauford S S, Kumari A, Garnett-Benson C. Ionizing radiation modulates the phenotype and  
138 function of human CD4<sup>+</sup> induced regulatory T cells. *BMC Immunol.* 21, 1-13 (2020).
- 139 [18] Bettelli E., et al. Reciprocal developmental pathways for the generation of pathogenic  
140 effector TH17 and regulatory T cells. *Nature* **441**, 235-8 (2006).
- 141 [19] Gooden, M. J. et al. The prognostic influence of tumour-infiltrating lymphocytes in cancer: a  
142 systematic review with meta-analysis. *Brit. J. Cancer.* **105**, 93-103 (2011).
- 143 [20] Plitas, G., et al. Regulatory T Cells in Cancer. *Annu. Rev. Cancer Biol.* **4**, 459-477 (2020).
- 144 [21] Curiel T. J. Tregs and rethinking cancer immunotherapy. *J. Clin. Invest.* **117**, 1167-74 (2007).
- 145 [22] Borst, J., et al. CD4<sup>+</sup> T cell help in cancer immunology and immunotherapy. *Nat. Rev.*  
146 *Immunol.* **18**, 635-647 (2018).
- 147 [23] Kennedy, R., and Celis, E. Multiple roles for CD4<sup>+</sup> T cells in anti-tumor immune responses.  
148 *Immunol. Rev.* **222**, 129-144 (2008).
- 149 [24] Oleinika K., et al. Suppression, subversion and escape: the role of regulatory T cells in cancer  
150 progression. *Clin. Exp. Immunol.* **171**, 36-45 (2013).

151 **Special thanks to Reviewer #3 for his/her good comments. These comments have**  
152 **significantly improved the quality of this paper and pointed out the direction of**  
153 **our future studies.**

154

155 We tried our best to improve the manuscript and made some modifications in the  
156 manuscript. These changes will not influence the content and framework of the  
157 manuscript. And we marked these changes in yellow in revised manuscript.

158 We appreciate for Reviewers' warm work earnestly, and hope that these corrections  
159 will meet with approval.

160 Once again, thank you very much for your comments and suggestions. These  
161 comments have significantly improved the quality of our manuscript.

162

163 Best Regards

164 Yiqiao Hu PhD, Professor

165 School of Life Science and Medical School of Nanjing University, Nanjing University,  
166 Nanjing 210093, China.

167 Tel: +86-25-83596143; E-mail: huyiqiao@nju.edu.cn.

## REVIEWERS' COMMENTS

Reviewer #3 (Remarks to the Author):

The authors have responded to previous concerns/comments with additional data and extended discussions. In my opinion, the manuscript is now appropriate for publication in Nature Communications.
